# Supplementary material for: Taming the late Quaternary phylogeography of the Eurasiatic wild ass through ancient and modern DNA
Source: PLoS One. 2017 Apr 19;12(4):e0174216. doi: 10.1371/journal.pone.0174216 (PMC5396879; doi:10.1371/journal.pone.0174216)
Supplement: S1 File — Table A Description of all samples analyzed Table B Primers used to amplify mitochondrial sequences Table C Description of published sequences used Table D Sample location and results of sPCA analysis Table E Summary statistics for the kiangs and dziggetais of the K and KD clades using the 296 bp HVR sequence Table F Characteristics, measurements (mm) and zoological assignment of samples from Iranian archeological sites Table G Comparison of measurements from the sample DAG2 from Daghestan-Velikent with those from other hemiones and a kiang Table H Comparative measurements of skeletal parts of late and Bronze Age E. hemionus hemippus Table I Measurements of the teeth of the hydruntines of Cheia Table J Comparative measurements (mm) of the analyzed metacarpals of the caves of Artenac and Pair-Non-Pair Table K Determination of the specificity index of the hydruntine bones Table L Studbook register of the founder animals from the Hai-Bar-Yotveta Reserve (XLSX) [file pone.0174216.s001.xlsx]

## Sheet: Table content
Table A	Description of all samples analyzed
Table B	Primers used to amplify mitochondrial sequences
Table C	Description of published sequences used
Table D	Sample location and results of sPCA analysis
Table E	Summary statistics for the kiangs and dziggetais of the K and KD clades using the 296 bp HVR sequence
Table F	Characteristics, measurements (mm) and zoological assignment of samples from Iranian archeological sites
Table G	Comparison of measurements from the sample DAG2 from Daghestan-Velikent with those from other hemiones and a kiang
Table H	Comparative measurements of skeletal parts of late and Bronze Age E. hemionus hemippus
Table I	Measurements of the teeth of the hydruntines of Cheia
Table J	Comparative measurements (mm) of the analyzed metacarpals of the caves of Artenac and Pair-Non-Pair
Table K	Determination of the specificity index of the hydruntine bones
Table L	Studbook register of the founder animals from the Hai-Bar-Yotveta Reserve

## Sheet: Table A
	lab code	archaeological or collection code	analyzed sample	origin	age	taxonomic classification*	mito genotype	location	provider	mito haplogroup	replication MP	chr. Y (marker)$
Central/East Asia	Ki1899-610.MNHN	1899-610 n°24	tooth	unknown (MNHN)	1899	E. kiang	E. kiang	Muséum National d'Histoire Naturelle Paris, France	Joséphine Lésur, Eric Pellé	K
	Ki1946.NMW	NMW BH'08	hoof	unknown (Tiergarten Schönbrunn)	1946	E. kiang	E. kiang	National History Museum Vienna, Austria	Joséphine Lésur, Eric Pellé	KD
	Kiang.Sigean		hair	Tibet (Réserve Africaine de Sigean, France)	2002-2005	E. kiang	E. hemionus	Réserve Africaine de Sigean, France	Elodie Trunet	K
	DGobiA1		DNA	Gobi desert A (Mongolia; position 96,82054/44,59090)	2002-2005	E. hemionus hemionus	E. hemionus	Research Institute of Wildlife Ecology, University of Veterinary Medicine, Vienna, Austria	Petra Kaczensky, Chris Walzer	D2
	DGobiA2		DNA	Gobi desert A (Mongolia; position 97,77766/43,31278)	2002-2005	E. hemionus hemionus	E. hemionus	Research Institute of Wildlife Ecology, University of Veterinary Medicine, Vienna, Austria	Petra Kaczensky, Chris Walzer	D1
	DGobiA4		DNA	Gobi desert A, Mongolia (position 96,70083/44,38597)	2002-2005	E. hemionus hemionus	E. hemionus	Research Institute of Wildlife Ecology, University of Veterinary Medicine, Vienna, Austria	Petra Kaczensky, Chris Walzer	KD
	DGobiA5		DNA	Gobi desert A (Mongolia; position 96,70083/44,38597)	2002-2005	E. hemionus hemionus	E. hemionus	Research Institute of Wildlife Ecology, University of Veterinary Medicine, Vienna, Austria	Petra Kaczensky, Chris Walzer	KD
	DGobiA10		DNA	Gobi desert A (Mongolia)	2002-2005	E. hemionus hemionus	E. hemionus	Research Institute of Wildlife Ecology, University of Veterinary Medicine, Vienna, Austria	Petra Kaczensky, Chris Walzer	KD
	DGobiB3		DNA	Gobi desert B (Mongolia; position 92,32124/45,48973)	2002-2005	E. hemionus hemionus	E. hemionus	Research Institute of Wildlife Ecology, University of Veterinary Medicine, Vienna, Austria	Petra Kaczensky, Chris Walzer	KD
	DGobiB6		DNA	Gobi desert B (Mongolia; position 93,31611/45,39832)	2002-2005	E. hemionus hemionus	E. hemionus	Research Institute of Wildlife Ecology, University of Veterinary Medicine, Vienna, Austria	Petra Kaczensky, Chris Walzer	KD
	DGobiB8		DNA	Gobi desert B (Mongolia)	2002-2005	E. hemionus hemionus	E. hemionus	Research Institute of Wildlife Ecology, University of Veterinary Medicine, Vienna, Austria	Petra Kaczensky, Chris Walzer	KD
	DGobiB18		DNA	Gobi desert B (Mongolia)	2002-2005	E. hemionus hemionus	E. caballus	Research Institute of Wildlife Ecology, University of Veterinary Medicine, Vienna, Austria	Petra Kaczensky, Chris Walzer	E. caballus
	DGobiB19		DNA	Gobi desert B (Mongolia)	2002-2005	E. hemionus hemionus	E. hemionus	Research Institute of Wildlife Ecology, University of Veterinary Medicine, Vienna, Austria	Petra Kaczensky, Chris Walzer	KD
	DGobiB20		DNA	Gobi desert B (Mongolia)	2002-2005	E. hemionus hemionus	E. hemionus	Research Institute of Wildlife Ecology, University of Veterinary Medicine, Vienna, Austria	Petra Kaczensky, Chris Walzer	KD
	DGobiS13		DNA	Small Gobi desert (Mongolia)	2002-2005	E. hemionus hemionus	E. hemionus	Research Institute of Wildlife Ecology, University of Veterinary Medicine, Vienna, Austria	Petra Kaczensky, Chris Walzer	D1
	DGobiS15		DNA	Small Gobi desert (Mongolia)	2002-2005	E. hemionus hemionus	E. hemionus	Research Institute of Wildlife Ecology, University of Veterinary Medicine, Vienna, Austria	Petra Kaczensky, Chris Walzer	KD
	DGobiS16		DNA	Small Gobi desert (Mongolia)	2002-2005	E. hemionus hemionus	E. hemionus	Research Institute of Wildlife Ecology, University of Veterinary Medicine, Vienna, Austria	Petra Kaczensky, Chris Walzer	KD
	DGobiS27		DNA	Small Gobi desert (Mongolia)	2002-2005	E. hemionus hemionus	E. hemionus	Research Institute of Wildlife Ecology, University of Veterinary Medicine, Vienna, Austria	Petra Kaczensky, Chris Walzer	D1
	DGobiS33		DNA	Small Gobi desert (Mongolia)	2002-2005	E. hemionus hemionus	E. hemionus	Research Institute of Wildlife Ecology, University of Veterinary Medicine, Vienna, Austria	Petra Kaczensky, Chris Walzer	KD
	DGobiS61		DNA	Small Gobi desert (Mongolia)	2002-2005	E. hemionus hemionus	E. hemionus	Research Institute of Wildlife Ecology, University of Veterinary Medicine, Vienna, Austria	Petra Kaczensky, Chris Walzer	D1
Iran	ZAGH1	ZA 1354 Tr GIX (T10)	Upper molar	Zagheh (Iran)	7-6th millennium BCE	small equid/E. caballus/E. asinus	E. hemionus	Muséum National d'Histoire Naturelle, Archeozoology & Archeobotany, Paris, France	Marjan Mashkour	I
	ZAGH2	TZ (T3)	upper molar	Zagheh (Iran)	7-6th millennium BCE	E. hemionus/small equid/E. asinus	E. hemionus	Muséum National d'Histoire Naturelle, Archeozoology & Archeobotany, Paris, France	Marjan Mashkour	I
	ZAGH3	TZ (T5)	tooth	Zagheh (Iran)	7-6th millennium BCE	E. caballus/small equid	E. hemionus	Muséum National d'Histoire Naturelle, Archeozoology & Archeobotany, Paris, France	Marjan Mashkour	CI
	ZAGH4	ZADIX 70-90 CB5	upper molar	Zagheh (Iran)	7-6th millennium BCE	E. caballus/E. hemionus/small equid/undeterminable	E. hemionus	Muséum National d'Histoire Naturelle, Archeozoology & Archeobotany, Paris, France	Marjan Mashkour	CI
	Mush1	2MS-39	talus	Tall-i-Mushki (Iran)	Neolithic	small equid	no result	Muséum National d'Histoire Naturelle, Archeozoology & Archeobotany, Paris, France	Marjan Mashkour
	Mush2	2MS-235-37	talus	Tall-i-Mushki (Iran)	Neolithic	small equid	no result	Muséum National d'Histoire Naturelle, Archeozoology & Archeobotany, Paris, France	Marjan Mashkour
	Mush3	2MS-38-39	lower molar	Tall-i-Mushki (Iran)	Neolithic	small equid	no result	Muséum National d'Histoire Naturelle, Archeozoology & Archeobotany, Paris, France	Marjan Mashkour
	Mush4	2MS 150-4	tooth	Tall-i-Mushki (Iran)	Neolithic	small equid	no result	Muséum National d'Histoire Naturelle, Archeozoology & Archeobotany, Paris, France	Marjan Mashkour
	Sial1	A(2) Period III/1120-130	incisor	Sialk (Iran)	8,000 BP	small equid	no result	Muséum National d'Histoire Naturelle, Archeozoology & Archeobotany, Paris, France	Marjan Mashkour
	DEKH1	TT4 Loc404	second posterior phalanx	Deh Kheir (Iran)	Late Neolithic	small equid	E. hemionus	Muséum National d'Histoire Naturelle, Archeozoology & Archeobotany, Paris, France	Marjan Mashkour	I		E. hemionus (Y3B8 and Y3B17)
	JariA1	JA-A-4b	distal tibia	Tall-i-JariA (Iran)	~6,000 BP	E. hemionus/small equid/not caballus	E. hemionus	Muséum National d'Histoire Naturelle, Archeozoology & Archeobotany, Paris, France	Marjan Mashkour	TI*
	JariA2	JA-E-7	distal tibia	Tall-i-JariA (Iran)	~6,000 BP	small equid	no result	Muséum National d'Histoire Naturelle, Archeozoology & Archeobotany, Paris, France	Marjan Mashkour
	JariA3	JA-F(4F)	distal tibia	Tall-i-JariA (Iran)	~6,000 BP	small equid	no result	Muséum National d'Histoire Naturelle, Archeozoology & Archeobotany, Paris, France	Marjan Mashkour
	JariA4	JA-A-11	3rd lower molar	Tall-i-JariA (Iran)	6,030 +/- 30 BP	E. hydruntinus	no result	Muséum National d'Histoire Naturelle, Archeozoology & Archeobotany, Paris, France	Marjan Mashkour
	JariA5	JA-D5	tooth	Tall-i-JariA (Iran)	~6,000 BP	E. hydruntinus	no result	Muséum National d'Histoire Naturelle, Archeozoology & Archeobotany, Paris, France	Marjan Mashkour
	MARAL1	AT45 depth 10-55 30.6.80	1st anterior phalanx	Maral Tepe (Iran)	Chalcolithic/Bronze Age	E. hemionus/small equid	E. hemionus	Muséum National d'Histoire Naturelle, Archeozoology & Archeobotany, Paris, France	Marjan Mashkour	CI
	MARAL2	AT47.400 depth 107-127 26.6.80	1st posterior phalanx	Maral Tepe (Iran)	Chalcolithic/Bronze Age	E. hemionus/E. hydruntinus/small equid	E. hemionus	Muséum National d'Histoire Naturelle, Archeozoology & Archeobotany, Paris, France	Marjan Mashkour	CI		E. hemionus (Y3B17)
	Qabr1	Sc25	tooth	Qabrestan (Iran)	4th millennium BCE	E. hemionus/E. asinus/small equid	E. hemionus	Muséum National d'Histoire Naturelle, Archeozoology & Archeobotany, Paris, France	Marjan Mashkour	I
	Qabr2	SC 301 (SC1)	upper molar	Qabrestan (Iran)	4th millennium BCE	E. hemionus/E. asinus/small equid	E. hemionus	Muséum National d'Histoire Naturelle, Archeozoology & Archeobotany, Paris, France	Marjan Mashkour	CI
	Qabr3	SCN IX G43 II 35-53 (SC15)	tooth	Qabrestan (Iran)	4th millennium BCE	E. hemionus/E. asinus/small equid	E. hemionus	Muséum National d'Histoire Naturelle, Archeozoology & Archeobotany, Paris, France	Marjan Mashkour	CI
	Qabr4	SCM A50 (SC12)	tooth	Qabrestan (Iran)	4th millennium BCE	E. hemionus	no result	Muséum National d'Histoire Naturelle, Archeozoology & Archeobotany, Paris, France	Marjan Mashkour
	SAZA1	SAG'OXXI/3 Pit2	lower molar	Sagzabad (Iran)	2nd-1st millennium BCE	small equid	no result	Muséum National d'Histoire Naturelle, Archeozoology & Archeobotany, Paris, France	Marjan Mashkour
	SAZA2	SAG'TrA LVII 1349 (S61)	upper molar	Sagzabad (Iran)	2nd -1st millennium BCE	E. hemionus/E. caballus/E. hydruntinus/E. asinus	E. hemionus	Muséum National d'Histoire Naturelle, Archeozoology & Archeobotany, Paris, France	Marjan Mashkour	I
	SAZA3	SAG' TrXX2 (S45)	right mandible with P2.3.4	Sagzabad (Iran)	2nd -1st millennium BCE	E. caballus/small equid/undeterminable	E. caballus	Muséum National d'Histoire Naturelle, Archeozoology & Archeobotany, Paris, France	Marjan Mashkour	E. caballus
	SAZA4	SAG'0XXI2 L.VI1353 (S29)	3rd upper molar	Sagzabad (Iran)	2nd -1st millennium BCE	E. hemionus/E. asinus	E. hemionus	Muséum National d'Histoire Naturelle, Archeozoology & Archeobotany, Paris, France	Marjan Mashkour	TI*
	SAZA5	SAG'TrA LVII (S61)	tooth	Sagzabad (Iran)	2nd -1st millennium BCE	E. hydruntinus/E. hemionus/E. asinus	E. hemionus	Muséum National d'Histoire Naturelle, Archeozoology & Archeobotany, Paris, France	Marjan Mashkour	CI
	SAZA6	SAG'0XX1/3 Pit2 1353 (S19)	upper molar	Sagzabad (Iran)	2nd -1st millennium BCE	E. hemionus/small equid/undeterminable	E. hemionus	Muséum National d'Histoire Naturelle, Archeozoology & Archeobotany, Paris, France	Marjan Mashkour	CI
	SAZA7	SAG'OXX 1/3 Pit2 1353 (S23)	upper molar	Sagzabad (Iran)	2nd -1st millennium BCE	E. hemionus/E. asinus/E. hydruntinus/small equid	E. hemionus	Muséum National d'Histoire Naturelle, Archeozoology & Archeobotany, Paris, France	Marjan Mashkour	CI
	QB1		tooth	Qaleh Bozi (Iran)	Mousterian	E. hemionus	no result	Muséum National d'Histoire Naturelle, Archeozoology & Archeobotany, Paris, France	Marjan Mashkour
	QB2		tooth	Qaleh Bozi (Iran)	Mousterian	E. hydruntinus/asinus	no result	Muséum National d'Histoire Naturelle, Archeozoology & Archeobotany, Paris, France	Marjan Mashkour
	QB3		tooth	Qaleh Bozi (Iran)	89 BP	E. hemionus/E. süssemionus/E. caballus	E. caballus	Muséum National d'Histoire Naturelle, Archeozoology & Archeobotany, Paris, France	Marjan Mashkour	E. caballus
	QB5		tooth	Qaleh Bozi (Iran)	Mousterian	E. hemionus/caballus	no result	Muséum National d'Histoire Naturelle, Archeozoology & Archeobotany, Paris, France	Marjan Mashkour
	QB5		tooth	Qaleh Bozi (Iran)	Mousterian	E. hemionus	no result	Muséum National d'Histoire Naturelle, Archeozoology & Archeobotany, Paris, France	Marjan Mashkour
	QB7		tooth	Qaleh Bozi (Iran)	Mousterian	E. hydruntinus	no result	Muséum National d'Histoire Naturelle, Archeozoology & Archeobotany, Paris, France	Marjan Mashkour
	QB8		tooth	Qaleh Bozi (Iran)	Mousterian	small equid	no result	Muséum National d'Histoire Naturelle, Archeozoology & Archeobotany, Paris, France	Marjan Mashkour
	QB9		tooth	Qaleh Bozi (Iran)	Mousterian	E. hemionus/asinus	no result	Muséum National d'Histoire Naturelle, Archeozoology & Archeobotany, Paris, France	Marjan Mashkour
	QB10		tooth	Qaleh Bozi (Iran)	Mousterian	small equid	no result	Muséum National d'Histoire Naturelle, Archeozoology & Archeobotany, Paris, France	Marjan Mashkour
	QB12		tooth	Qaleh Bozi (Iran)	Mousterian	E. hemionus	no result	Muséum National d'Histoire Naturelle, Archeozoology & Archeobotany, Paris, France	Marjan Mashkour
	QB14		tooth	Qaleh Bozi (Iran)	Mousterian	small equid	no result	Muséum National d'Histoire Naturelle, Archeozoology & Archeobotany, Paris, France	Marjan Mashkour
	He1893-509.MNHN	MNHN 1893-509	tooth	Persia (MNHN)	19th century	E. hemionus	E. hemionus	Muséum National d'Histoire Naturelle Paris, France	Joséphine Lésur, Eric Pellé	E. hemionus
	He1909.MNHN	MNHN 1909-308	hoof	born in the Paris zoo (MNHN)	born 1895	E. hemionus	E. hemionus	Muséum National d'Histoire Naturelle Paris, France	Joséphine Lésur, Eric Pellé	H2
	Khart0	no number	metatarsal/metacarpal	Natural reserve of Khartouran (Iran)	1997	E. hemionus (onager)	E. hemionus	University Teheran, Iran	Marjan Mashkour	close to I
	Khart1	1	metapodial	Natural reserve of Khartouran (Iran)	1997	E. hemionus (onager)	E. hemionus	University Teheran, Iran	Marjan Mashkour	I
	Khart2	2	metapodial	Natural reserve of Khartouran (Iran)	1997	E. hemionus (onager)	E. hemionus	University Teheran, Iran	Marjan Mashkour	I
	Khart3	3	mandible	Natural reserve of Khartouran (Iran)	1997	E. hemionus (onager)	E. hemionus	University Teheran, Iran	Marjan Mashkour	I
	OnA.Sigean		feces	Iran (Jihanne, n°863; Sigean)	2011	E. hemionus (onager)	E. hemionus	Réserve Africaine de Sigean, France	Elodie Trunet	I
	OnB.Sigean		feces	Iran (Jihanne, n°863; Sigean)	2011	E. hemionus (onager)	E. hemionus	Réserve Africaine de Sigean, France	Elodie Trunet	I
	On.BeG1_0	On.BIG1_0	feces	Iran (Bahram-e Goor reserve)	1989-1991	E. hemionus (onager)	E. hemionus		Mahmoud-Reza Hemami, Chris Walzer	I
	On.BeG11_0	On.BIG11_0	feces	Iran (Bahram-e Goor reserve)	1989-1991	E. hemionus (onager)	E. hemionus		Mahmoud-Reza Hemami, Chris Walzer	I
	On.BeG2_0	On.BIG2_0	feces	Iran (Bahram-e Goor reserve)	1989-1991	E. hemionus (onager)	E. hemionus		Mahmoud-Reza Hemami, Chris Walzer	I
	On.BeG3_0	On.BIG3_0	feces	Iran (Bahram-e Goor reserve)	1989-1991	E. hemionus (onager)	E. hemionus		Mahmoud-Reza Hemami, Chris Walzer	I
	On.BeG4_0	On.BIG4_0	feces	Iran (Bahram-e Goor reserve)	1989-1991	E. hemionus (onager)	E. hemionus		Mahmoud-Reza Hemami, Chris Walzer	I
	On.BeG5_0	On.BIG5_0	feces	Iran (Bahram-e Goor reserve)	1989-1991	E. hemionus (onager)	E. hemionus		Mahmoud-Reza Hemami, Chris Walzer	I
	On.BeG6_0	On.BIG6_0	feces	Iran (Bahram-e Goor reserve)	1989-1991	E. hemionus (onager)	E. hemionus		Mahmoud-Reza Hemami, Chris Walzer	I
	On.BeG7_0	On.BIG7_0	feces	Iran (Bahram-e Goor reserve)	1989-1991	E. hemionus (onager)	E. hemionus		Mahmoud-Reza Hemami, Chris Walzer	I
	On.BeG8_0	On.BIG8_0	feces	Iran (Bahram-e Goor reserve)	1989-1991	E. hemionus (onager)	E. hemionus		Mahmoud-Reza Hemami, Chris Walzer	I
	On.BeG9_0	On.BIG9_0	feces	Iran (Bahram-e Goor reserve)	1989-1991	E. hemionus (onager)	E. hemionus		Mahmoud-Reza Hemami, Chris Walzer	I
	On.BeG10_0	On.BIG10_0	feces	Iran (Bahram-e Goor reserve)	1989-1991	E. hemionus (onager)	E. hemionus		Mahmoud-Reza Hemami, Chris Walzer	I
	On.BeG12_0	On.BIG12_0	feces	Iran (Bahram-e Goor reserve)	1989-1991	E. hemionus (onager)	E. hemionus		Mahmoud-Reza Hemami, Chris Walzer	I
	On.BeG13_0	On.BIG13_0	feces	Iran (Bahram-e Goor reserve)	1989-1991	E. hemionus (onager)	E. hemionus		Mahmoud-Reza Hemami, Chris Walzer	I
	Isr.F1_0	Isr.F1_0	DNA	Hai-Bar Yotveta breeding core (Israel)	1989-1991	offsprings of onagers from Iran and Turkmenistan	E. hemionus	Israel Nature and Park Authority (INPA) breeding core established at the Hai-Bar Yotvata Reserve, Israel	Shirli Bar-David	I
	Isr.F4_0	Isr.F4_0	DNA	Hai-Bar Yotveta breeding core (Israel)	1989-1991	offsprings of onagers from Iran and Turkmenistan	E. hemionus	Israel Nature and Park Authority (INPA) breeding core established at the Hai-Bar Yotvata Reserve, Israel	Shirli Bar-David	I
	Isr.F5_0	Isr.F5_0	DNA	Hai-Bar Yotveta breeding core (Israel)	1989-1991	offsprings of onagers from Iran and Turkmenistan	E. hemionus	Israel Nature and Park Authority (INPA) breeding core established at the Hai-Bar Yotvata Reserve, Israel	Shirli Bar-David	I
	Isr.F7_0	Isr.F7_0	DNA	Hai-Bar Yotveta breeding core (Israel)	1989-1991	offsprings of onagers from Iran and Turkmenistan	E. hemionus	Israel Nature and Park Authority (INPA) breeding core established at the Hai-Bar Yotvata Reserve, Israel	Shirli Bar-David	I
	Isr.M1_0	Isr.M1_0	DNA	Hai-Bar Yotveta breeding core (Israel)	1989-1991	offsprings of onagers from Iran and Turkmenistan	E. hemionus	Israel Nature and Park Authority (INPA) breeding core established at the Hai-Bar Yotvata Reserve, Israel	Shirli Bar-David	I
	Isr.M11_0	Isr.M11_0	DNA	Hai-Bar Yotveta breeding core (Israel)	1989-1991	offsprings of onagers from Iran and Turkmenistan	E. hemionus	Israel Nature and Park Authority (INPA) breeding core established at the Hai-Bar Yotvata Reserve, Israel	Shirli Bar-David	I
	Isr.F11_0	Isr.F11_0	DNA	Hai-Bar Yotveta breeding core (Israel)	1989-1991	offsprings of onagers from Iran and Turkmenistan	E. hemionus	Israel Nature and Park Authority (INPA) breeding core established at the Hai-Bar Yotvata Reserve, Israel	Shirli Bar-David	TI
	Isr.M16_0	Isr.M16_0	DNA	Hai-Bar Yotveta breeding core (Israel)	1989-1991	offsprings of onagers from Iran and Turkmenistan	E. hemionus	Israel Nature and Park Authority (INPA) breeding core established at the Hai-Bar Yotvata Reserve, Israel	Shirli Bar-David	TI
	Isr.M17_0	Isr.M17_0	DNA	Hai-Bar Yotveta breeding core (Israel)	1989-1991	offsprings of onagers from Iran and Turkmenistan	E. hemionus	Israel Nature and Park Authority (INPA) breeding core established at the Hai-Bar Yotvata Reserve, Israel	Shirli Bar-David	TI
	Isr.F10_0	Isr.F10_0	DNA	Hai-Bar Yotveta breeding core (Israel)	1989-1991	offsprings of onagers from Iran and Turkmenistan	E. hemionus	Israel Nature and Park Authority (INPA) breeding core established at the Hai-Bar Yotvata Reserve, Israel	Shirli Bar-David	TI
	Isr.F2_0	Isr.F2_0	DNA	Hai-Bar Yotveta breeding core (Israel)	1989-1991	offsprings of onagers from Iran and Turkmenistan	E. hemionus	Israel Nature and Park Authority (INPA) breeding core established at the Hai-Bar Yotvata Reserve, Israel	Shirli Bar-David	TI
	Isr.F3_0	Isr.F3_0	DNA	Hai-Bar Yotveta breeding core (Israel)	1989-1991	offsprings of onagers from Iran and Turkmenistan	E. hemionus	Israel Nature and Park Authority (INPA) breeding core established at the Hai-Bar Yotvata Reserve, Israel	Shirli Bar-David	TI
	Isr.F8_0	Isr.F8_0	DNA	Hai-Bar Yotveta breeding core (Israel)	1989-1991	offsprings of onagers from Iran and Turkmenistan	E. hemionus	Israel Nature and Park Authority (INPA) breeding core established at the Hai-Bar Yotvata Reserve, Israel	Shirli Bar-David	TI
	Isr.F9_0	Isr.F9_0	DNA	Hai-Bar Yotveta breeding core (Israel)	1989-1991	offsprings of onagers from Iran and Turkmenistan	E. hemionus	Israel Nature and Park Authority (INPA) breeding core established at the Hai-Bar Yotvata Reserve, Israel	Shirli Bar-David	TI
	Isr.M18_0	Isr.M18_0	DNA	Hai-Bar Yotveta breeding core (Israel)	1989-1991	offsprings of onagers from Iran and Turkmenistan	E. hemionus	Israel Nature and Park Authority (INPA) breeding core established at the Hai-Bar Yotvata Reserve, Israel	Shirli Bar-David	TI
	Isr.M3_0	Isr.M3_0	DNA	Hai-Bar Yotveta breeding core (Israel)	1989-1991	offsprings of onagers from Iran and Turkmenistan	E. hemionus	Israel Nature and Park Authority (INPA) breeding core established at the Hai-Bar Yotvata Reserve, Israel	Shirli Bar-David	TI
	Isr.M5_0	Isr.M5_0	DNA	Hai-Bar Yotveta breeding core (Israel)	1989-1991	offsprings of onagers from Iran and Turkmenistan	E. hemionus	Israel Nature and Park Authority (INPA) breeding core established at the Hai-Bar Yotvata Reserve, Israel	Shirli Bar-David	TI
India	KhA2313.MNHN	MNHN A2313	tooth	"Pays de Kutch" (India)	1838	E. hemionus khur	E. hemionus	Muséum National d'Histoire Naturelle Paris, France	Joséphine Lésur, Eric Pellé	Kh
	KhA549.MNHN	MNHN A.549	skin	"Pays de Kutch" Hindustan (India)	1849	E. hemionus khur	E. hemionus	Muséum National d'Histoire Naturelle Paris, France	Joséphine Lésur, Eric Pellé	Kh
Syria	UET1		upper third molar	Umm el-Tlel (Syria)	rearranged Mousterian	E. hemippus/E. hydruntinus	no result	Université de Savoie, Laboratoire EDYTEM, Le Bourget-du-Lac , France	Christophe Griggo
	UET2	UM94 VI3a'AI 159 n° 3	fragment of diaphysis of metatarsal	Umm el-Tlel (Syria)	rearranged Mousterian	E. hemippus	no result	Université de Savoie, Laboratoire EDYTEM, Le Bourget-du-Lac , France	Christophe Griggo
	UET3	UM94 BQ 155 VI 2 aa n° 59	lower left premolar	Umm el-Tlel (Syria)	rearranged Mousterian	E. hemippus/E. hydruntinus	no result	Université de Savoie, Laboratoire EDYTEM, Le Bourget-du-Lac , France	Christophe Griggo
	UET4	UM94 BM 154 VI 2 a n° 2	upper left molar 2	Umm el-Tlel (Syria)	rearranged Mousterian	E. hemippus	no result	Université de Savoie, Laboratoire EDYTEM, Le Bourget-du-Lac , France	Christophe Griggo
	UET5		lower left premolar	Umm el-Tlel (Syria)	rearranged Mousterian	E. africanus?	no result	Université de Savoie, Laboratoire EDYTEM, Le Bourget-du-Lac , France	Christophe Griggo
	UET6	UM94 VI3a'AH 158 n°50	left ulna-radius	Umm el-Tlel (Syria)	rearranged Mousterian	E. africanus/E. hydruntinus	no result	Université de Savoie, Laboratoire EDYTEM, Le Bourget-du-Lac , France	Christophe Griggo
	UET7	UM91 V2 g/Da BQ 154 n°12	lower left molar 1	Umm el-Tlel (Syria)	rearranged Mousterian	E. africanus	no result	Université de Savoie, Laboratoire EDYTEM, Le Bourget-du-Lac , France	Christophe Griggo
	UET8	UM94 BN 153 V2IIb n°113	distal left ulna-radius	Umm el-Tlel (Syria)	rearranged Mousterian	E. hemippus/E. africanus	no result	Université de Savoie, Laboratoire EDYTEM, Le Bourget-du-Lac , France	Christophe Griggo
	UET9	UM93 VI 3a'1 Al 1 155 n°227	left tibia	Umm el-Tlel (Syria)	rearranged Mousterian	E. hemionus/E. africanus	no result	Université de Savoie, Laboratoire EDYTEM, Le Bourget-du-Lac , France	Christophe Griggo
	UET10	UM94 VI 3aO Bo154 n°94	upper left molar 1	Umm el-Tlel (Syria)	rearranged Mousterian	E. africanus?	no result	Université de Savoie, Laboratoire EDYTEM, Le Bourget-du-Lac , France	Christophe Griggo
	UET11	UM91 V2 g/Da BQ 154 n°12	lower left premolar	Umm el-Tlel (Syria)	rearranged Mousterian	Kiang?	no result	Université de Savoie, Laboratoire EDYTEM, Le Bourget-du-Lac , France	Christophe Griggo
	UET12	UM91 VI 3d BL-BK 153-154	Upper right molar 3	Umm el-Tlel (Syria)	rearranged Mousterian	Kiang/horse	no result	Université de Savoie, Laboratoire EDYTEM, Le Bourget-du-Lac , France	Christophe Griggo
	BD1	BDER EQ-1	femur	Tell B'Deri (Syria)	rearranged Mousterian	E. hemionus	no result	Université de Savoie, Laboratoire EDYTEM, Le Bourget-du-Lac , France	Christophe Griggo
	MUNB1	SBZ Strasse	distal radius	Munbaqa (Syria)	Late Bronze Age	E. hemionus/not caballus	E. hemippus	Bavarian State Collection of Anthropology and Palaeoanatomy (SAPM), Munich, Germany	Joris Peters	S
	MUNB2		tibia	Munbaqa (Syria)	Late Bronze Age	E. hemionus/not caballus	E. hemippus	Bavarian State Collection of Anthropology and Palaeoanatomy (SAPM), Munich, Germany	Joris Peters	S
	MUNB6	SBZ 2383 12/16 H2-H3 Raum 94	distal humerus	Munbaqa (Syria)	Late Bronze Age	E. hemionus/E. asinus/not caballus	E. hemippus	Bavarian State Collection of Anthropology and Palaeoanatomy (SAPM), Munich, Germany	Joris Peters	S
	MUNB8		scapula	Munbaqa (Syria)	Late Bronze Age	E. hemionus/E. asinus/not caballus	E. hemippus	Bavarian State Collection of Anthropology and Palaeoanatomy (SAPM), Munich, Germany	Joris Peters	S
	He1902.MNHN	1902-354	tooth	unknown	1867	E. hemionus	E. hemippus	Muséum National d'Histoire Naturelle Paris, France	Joséphine Lésur, Eric Pellé	S
	Hm1865.MNHN	C.G. 1977 n°83	skull	"deserts of Syria" (gift from Empress Eugénie 1853; MNHN)	1865	E. hemippus	E. hemippus	Muséum National d'Histoire Naturelle Paris, France	Joséphine Lésur, Eric Pellé	S
	Hm1929.NMW	NMW 5493/B 3625	hair and skin	Desert of Alep/Halab (NMW)	1929	E. o.hemippus	E. hemippus	National History Museum Vienna, Austria	Frank Zachos	S
	Hm1892.NMW	NMW 1308	hair and skin	Desert of Alep/Halab (NMW)	1892	E. o.hemippus	E. hemippus	National History Museum Vienna, Austria	Frank Zachos	S
	Hm1864.NMW	NMW 6048/ST345	hair	Desert of Alep/Halab (NMW)	1864	E. o.hemippus	E. hemippus	National History Museum Vienna, Austria	Frank Zachos	S
Caucasus	M1	MOKH-EQ-01	radius	Mokhrablur (Armenia)	Bronze Age (c. 4,900 BP)	E. hemionus	E. hemionus	University Tübingen, Zentrum für Naturwissenschaftliche Archäologie, Germany	Hans-Peter Uerpmann	CI
	M2	MOKH-EQ-02	radius	Mokhrablur (Armenia)	Bronze Age (c. 4,900 BP)	E. hemionus	E. hemionus	University Tübingen, Zentrum für Naturwissenschaftliche Archäologie, Germany	Hans-Peter Uerpmann	CI
	S1	SHEN-EQ-01	humerus	Shengavit (Armenia)	Bronze Age (c. 5,000 BP)	E. hemionus	E. hemionus	University Tübingen, Zentrum für Naturwissenschaftliche Archäologie, Germany	Hans-Peter Uerpmann	CI	CI	E. hemionus (Y3B17 and Y3B8)
	S2	SHEN-EQ-02	Scapula	Shengavit (Armenia)	Bronze Age (c. 5,000 BP)	E. hemionus	E. hemionus	University Tübingen, Zentrum für Naturwissenschaftliche Archäologie, Germany	Hans-Peter Uerpmann	CI
	S3	SHEN-EQ-03	pelvis	Shengavit (Armenia)	Bronze Age (c. 5,000 BP)	E. hemionus	no result	University Tübingen, Zentrum für Naturwissenschaftliche Archäologie, Germany	Hans-Peter Uerpmann
	S4	SHEN-EQ-04	tibia	Shengavit (Armenia)	Bronze Age (c. 5,000 BP)	E. hemionus	E. hemionus	University Tübingen, Zentrum für Naturwissenschaftliche Archäologie, Germany	Hans-Peter Uerpmann	CI
	GODZ1	GODZ6008-36	radius	Godedzor (Armenia)	c. 3,000-2,000 BCE	E. hemionus	no result	University Tübingen, Zentrum für Naturwissenschaftliche Archäologie, Germany	Hans-Peter Uerpmann
	D4	DIDI-EQ-04	tibia	Didi Gora (Georgia)	~2,500 BCE	E. hydruntinus	E. caballus	University Tübingen, Zentrum für Naturwissenschaftliche Archäologie, Germany	Hans-Peter Uerpmann	E. caballus	E. caballus	E. caballus (Y3B8)
	D8	DIDI-EQ-08	pelvis	Didi Gora (Georgia)	~2,500 BCE	E. hydruntinus	E. hemionus	University Tübingen, Zentrum für Naturwissenschaftliche Archäologie, Germany	Hans-Peter Uerpmann	CI
	TQ3	TQIS-EQ-03	metatarsus	Tqisbolu Gora (Georgia)	~4,000-3,000 BP	E. hydruntinus	E. hemionus	University Tübingen, Zentrum für Naturwissenschaftliche Archäologie, Germany	Hans-Peter Uerpmann	CI
	TQ4	TQIS-EQ-04	calcaneus	Tqisbolu Gora (Georgia)	~4,000-3,000 BP	E. hydruntinus	E. hemionus	University Tübingen, Zentrum für Naturwissenschaftliche Archäologie, Germany	Hans-Peter Uerpmann	CI
	TQ5	TQIS-EQ-05	metatarsal	Tqisbolu Gora (Georgia)	~4,000-3,000 BP	E. hydruntinus	E. caballus	University Tübingen, Zentrum für Naturwissenschaftliche Archäologie, Germany	Hans-Peter Uerpmann	E. caballus	E. caballus
	TQ44	TQIS-M15:272-44	tibia	Tqisbolu Gora (Georgia)	~4,000-3,000 BP	E. hydruntinus	E. caballus	University Tübingen, Zentrum für Naturwissenschaftliche Archäologie, Germany	Hans-Peter Uerpmann	E. caballus
	DAG1	IIc DAV-98#138 Mound n°II	3rd inferior molar left	Velikent (Daghestan)	1,800 - 1,700 BCE	E. hydruntinus/E. hemionus	E. hemionus	Laboratory of Archaeozoology, Dept. Biologia, Universidad Autonoma de Madrid, Spain	Arturo Morales-Muniz	CI
	DAG2	IIc DAV-98#138 Mound n°II	1st anterior phalanx right	Velikent (Daghestan)	1,800 - 1,700 BCE	E. hemionus	E. hemionus	Laboratory of Archaeozoology, Dept. Biologia, Universidad Autonoma de Madrid, Spain	Arturo Morales-Muniz	CI
	DAG1140	KIII-10 /6-1 f /155/9z/1140	molar	Velikent (Daghestan)	1,800 - 1,700 BCE	E. hemionus	E. caballus	Laboratory of Archaeozoology, Dept. Biologia, Universidad Autonoma de Madrid, Spain	Arturo Morales-Muniz	E. caballus
	Velmu		metapodial	Velikent (Daghestan)	1,800 - 1,700 BCE	E. hemionus/mule	E. hemionus	Laboratory of Archaeozoology, Dept. Biologia, Universidad Autonoma de Madrid, Spain	Arturo Morales-Muniz	I
Anatolia	GOBEK1	GTW 1 25/40	scapula	Göbekli Tepe (Turkey)	PPNA-PPNB (9,300-8,200 BCE)	E. hemionus	no result	Bavarian State Collection of Anthropology and Palaeoanatomy (SAPM), Munich, Germany	Joris Peters
	GOBEK2	GTW 1 25/40	femur	Göbekli Tepe (Turkey)	PPNA-PPNB (9,300-8,200 BCE)	E. hemionus	no result	Bavarian State Collection of Anthropology and Palaeoanatomy (SAPM), Munich, Germany	Joris Peters
	GOBEK3	GTW1 67/40	talus	Göbekli Tepe (Turkey)	PPNA-PPNB (9,300-8,200 BCE)	E. caballus/E. hemionus	E. caballus	Bavarian State Collection of Anthropology and Palaeoanatomy (SAPM), Munich, Germany	Joris Peters	E. caballus
	GOBEK4	GTW 1 67/40	scapula	Göbekli Tepe (Turkey)	PPNA-PPNB (9,300-8,200 BCE)	E. hemionus	no result	Bavarian State Collection of Anthropology and Palaeoanatomy (SAPM), Munich, Germany	Joris Peters
	GOBEK5	GTW 1 67/40	distal humerus	Göbekli Tepe (Turkey)	PPNA-PPNB (9,300-8,200 BCE)	E. hemionus	no result	Bavarian State Collection of Anthropology and Palaeoanatomy (SAPM), Munich, Germany	Joris Peters
	GOBEK6	GTW 1 67/40	distal radius	Göbekli Tepe (Turkey)	PPNA-PPNB (9,300-8,200 BCE)	E. hemionus	no result	Bavarian State Collection of Anthropology and Palaeoanatomy (SAPM), Munich, Germany	Joris Peters
	GOBEK7	GTW 52 1.1 50/46	scapula	Göbekli Tepe (Turkey)	PPNA-PPNB (9,300-8,200 BCE)	E. hemionus	no result	Bavarian State Collection of Anthropology and Palaeoanatomy (SAPM), Munich, Germany	Joris Peters
	GOBEK8	GTW 52 1.1 50/46	proximal femur	Göbekli Tepe (Turkey)	PPNA-PPNB (9,300-8,200 BCE)	E. hemionus	no result	Bavarian State Collection of Anthropology and Palaeoanatomy (SAPM), Munich, Germany	Joris Peters
	GOBEK9	GTW 52 1.1 40/40	metatarsal	Göbekli Tepe (Turkey)	PPNA-PPNB (9,300-8,200 BCE)	E. caballus/E. hemionus	E. hemionus	Bavarian State Collection of Anthropology and Palaeoanatomy (SAPM), Munich, Germany	Joris Peters	CI
	GOBEK10	GTW 1 30/40	talus	Göbekli Tepe (Turkey)	PPNA-PPNB (9,300-8,200 BCE)	E. hemionus	no result	Bavarian State Collection of Anthropology and Palaeoanatomy (SAPM), Munich, Germany	Joris Peters
	GOBEK11	GTW 1 30/40	distal humerus	Göbekli Tepe (Turkey)	PPNA-PPNB (9,300-8,200 BCE)	E. hemionus	no result	Bavarian State Collection of Anthropology and Palaeoanatomy (SAPM), Munich, Germany	Joris Peters
	GOBEK12	GTW 52 1.1 12/40	talus	Göbekli Tepe (Turkey)	PPNA-PPNB (9,300-8,200 BCE)	E. hemionus	no result	Bavarian State Collection of Anthropology and Palaeoanatomy (SAPM), Munich, Germany	Joris Peters
	GOBEK13	GTW 52 1.1 12/40	metacarpal	Göbekli Tepe (Turkey)	PPNA-PPNB (9,300-8,200 BCE)	E. hemionus	no result	Bavarian State Collection of Anthropology and Palaeoanatomy (SAPM), Munich, Germany	Joris Peters
	GOBEK14	GTW 52 1.1 12/40	distal humerus	Göbekli Tepe (Turkey)	PPNA-PPNB (9,300-8,200 BCE)	E. hemionus	no result	Bavarian State Collection of Anthropology and Palaeoanatomy (SAPM), Munich, Germany	Joris Peters
	GOBEK15	GTZ 16	talus	Göbekli Tepe (Turkey)	PPNA-PPNB (9,300-8,200 BCE)	E. hemionus	no result	Bavarian State Collection of Anthropology and Palaeoanatomy (SAPM), Munich, Germany	Joris Peters
	ASE 383	Level 2 AH 602.383	femur	Asikli Höyük (Turkey)	Aceramic Neolithic (7,850-7,300 BCE)	E. hemionus/E. hydruntinus	E. hemionus	Bavarian State Collection of Anthropology and Palaeoanatomy (SAPM), Munich, Germany	Joris Peters	H1
	ASE 382	Level 2 AH 602.382	tibia	Asikli Höyük (Turkey)	Aceramic Neolithic (7,850-7,300 BCE)	E. hemionus/E. hydruntinus	E. hemionus	Bavarian State Collection of Anthropology and Palaeoanatomy (SAPM), Munich, Germany	Joris Peters	H1	H1
	ASE 24	Level 3/4 M24-24	cranium	Asikli Höyük (Turkey)	Aceramic Neolithic (7,850-7,300 BCE)	E. hemionus/E. hydruntinus	E. hemionus	Bavarian State Collection of Anthropology and Palaeoanatomy (SAPM), Munich, Germany	Joris Peters	H1	H1
	ASE 56	Level 2 AH402.56	radius/ulna	Asikli Höyük (Turkey)	Aceramic Neolithic (7,850-7,300 BCE)	E. hemionus/E. hydruntinus	no result	Bavarian State Collection of Anthropology and Palaeoanatomy (SAPM), Munich, Germany	Joris Peters		no result
	ASE 33	Level 2 AH500.33	scapula	Asikli Höyük (Turkey)	Aceramic Neolithic (7,850-7,300 BCE)	E. hemionus/E. hydruntinus	no result	Bavarian State Collection of Anthropology and Palaeoanatomy (SAPM), Munich, Germany	Joris Peters		no result
	ASE 1132	Level 2 AH 602.383	humerus	Asikli Höyük (Turkey)	Aceramic Neolithic (7,850-7,300 BCE)	E. hemionus/E. hydruntinus	no result	Bavarian State Collection of Anthropology and Palaeoanatomy (SAPM), Munich, Germany	Joris Peters		no result
	ASE 3	Level 2 AH 602.382	scapula	Asikli Höyük (Turkey)	Aceramic Neolithic (7,850-7,300 BCE)	E. hemionus/E. hydruntinus	no result	Bavarian State Collection of Anthropology and Palaeoanatomy (SAPM), Munich, Germany	Joris Peters		no result
	ASE 384	Level 3/4 M24-24	tibia	Asikli Höyük (Turkey)	Aceramic Neolithic (7,850-7,300 BCE)	E. hemionus/E. hydruntinus	no result	Bavarian State Collection of Anthropology and Palaeoanatomy (SAPM), Munich, Germany	Joris Peters		no result
	ASE 385	Level 2 AH 602.385	tibia	Asikli Höyük (Turkey)	Aceramic Neolithic (7,850-7,300 BCE)	E. hemionus/E. hydruntinus	no result	Bavarian State Collection of Anthropology and Palaeoanatomy (SAPM), Munich, Germany	Joris Peters		no result
	ASE 386	Level 2 AH 602.386	radius	Asikli Höyük (Turkey)	Aceramic Neolithic (7,850-7,300 BCE)	E. hemionus/E. hydruntinus	no result	Bavarian State Collection of Anthropology and Palaeoanatomy (SAPM), Munich, Germany	Joris Peters		no result
	ASE 25	Level 3/4 M24-25	radius	Asikli Höyük (Turkey)	Aceramic Neolithic (8,350-7,740 BCE)	E. hemionus/E. hydruntinus	no result	Bavarian State Collection of Anthropology and Palaeoanatomy (SAPM), Munich, Germany	Joris Peters		no result
	ASE 1	Level 3/4 M25-1	phalanx 2	Asikli Höyük (Turkey)	Aceramic Neolithic (8,350-7,740 BCE)	E. hemionus/E. hydruntinus	no result	Bavarian State Collection of Anthropology and Palaeoanatomy (SAPM), Munich, Germany	Joris Peters		no result
	O1	ORFI EQ01	radius/ulna	Orman fidanligi (Turkey)	c. 8,000 BP	E. ferus	no result	University Tübingen, Zentrum für Naturwissenschaftliche Archäologie, Germany	Hans-Peter Uerpmann
	O2	ORFI M5-95-2	First anterior phalanx	Orman fidanligi (Turkey)	c. 8,000 BP	E. ferus	no result	University Tübingen, Zentrum für Naturwissenschaftliche Archäologie, Germany	Hans-Peter Uerpmann
	K1	AE19.81	scapula	Küllüoba (Turkey)	Early Bronze Age (2,800-2,500 BCE)	E. hydruntinus	E. hemionus	University Tübingen, Zentrum für Naturwissenschaftliche Archäologie, Germany	Hans-Peter Uerpmann	H1
	K2	U10.295 (EQHY.1)	tibia	Küllüoba (Turkey)	Early Bronze Age (2,800-2,500 BCE)	E. hydruntinus	E. hemionus	University Tübingen, Zentrum für Naturwissenschaftliche Archäologie, Germany	Hans-Peter Uerpmann	H1	H1
	K3	U10615	femur	Küllüoba (Turkey)	Early Bronze Age (2,800-2,500 BCE)	E. hydruntinus	E. hemionus	University Tübingen, Zentrum für Naturwissenschaftliche Archäologie, Germany	Hans-Peter Uerpmann	H1
	KSK1	Area H/10-11 Level I	mandible M3	Kösk Höyük (Turkey)	Late Neolithic (6,200-5,500 BCE)	E. hemionus	no result	Department of Anthropology, University of North Carolina at Chapel Hill, USA	Ben Arbuckle
	KSK2	Area H/10-11 level IV	mandible M1-2	Kösk Höyük (Turkey)	Late Neolithic (6,200-5,500 BCE)	E. hydruntinus	E. hemionus	Department of Anthropology, University of North Carolina at Chapel Hill, USA	Ben Arbuckle	H1
	KSK3	Area H/10-11 level IV	mandible P3-4	Kösk Höyük (Turkey)	Late Neolithic (6,200-5,500 BCE)	E. hydruntinus/E. hemionus/undeterminable	E. hemionus	Department of Anthropology, University of North Carolina at Chapel Hill, USA	Ben Arbuckle	H1
	KSK4	Area H/10-11 level IV	jaw P3-4/M1-2	Kösk Höyük (Turkey)	Late Neolithic (6,200-5,500 BCE)	E. hydruntinus/E. caballus/E. hemionus/E. asinus/undeterminable	E. hemionus	Department of Anthropology, University of North Carolina at Chapel Hill, USA	Ben Arbuckle	H1
	KSK5	Area H/11 level IV	mandible P3/4?	Kösk Höyük (Turkey)	Late Neolithic (6,200-5,500 BCE)	E. hydruntinus/E. caballus	E. caballus	Department of Anthropology, University of North Carolina at Chapel Hill, USA	Ben Arbuckle	E. caballus
	KSK6	Area H/11 level IV	mandible M1-2	Kösk Höyük (Turkey)	Late Neolithic (6,200-5,500 BCE)	E. hydruntinus	E. hemionus	Department of Anthropology, University of North Carolina at Chapel Hill, USA	Ben Arbuckle	H1
	KSK7	Area H/10-11 level IV	jaw P3-4/M1-2	Kösk Höyük (Turkey)	Late Neolithic (6,200-5,500 BCE)	E. hydruntinus/E. caballus/undeterminable	E. hemionus	Department of Anthropology, University of North Carolina at Chapel Hill, USA	Ben Arbuckle	H1
	KSK8	Area H/10-11 level IV	jaw P3-4/M1-2	Kösk Höyük (Turkey)	Late Neolithic (6,200-5,500 BCE)	E. hydruntinus/E. caballus/E. hemionus	E. hemionus	Department of Anthropology, University of North Carolina at Chapel Hill, USA	Ben Arbuckle	H1
	KSK9	Area H/10-11 level IV	mandible M3	Kösk Höyük (Turkey)	Late Neolithic (6,200-5,500 BCE)	E. hydruntinus/E. caballus/undeterminable	E. caballus	Department of Anthropology, University of North Carolina at Chapel Hill, USA	Ben Arbuckle	E. caballus
	KSK18	H/10-11, Level IV	tooth P/2	Kösk Höyük (Turkey)	Late Neolithic (6,200-5,500 BCE)	E. hydruntinus?	E. hemionus	Department of Anthropology, University of North Carolina at Chapel Hill, USA	Ben Arbuckle	H1
	KSK19	G/10-11, Level IV	tooth P/3-4 or M/1-2	Kösk Höyük (Turkey)	Late Neolithic (6,200-5,500 BCE)	E. hydruntinus?	E. hemionus	Department of Anthropology, University of North Carolina at Chapel Hill, USA	Ben Arbuckle	H1
	NT A1-76		distal tibia	Norşun Tepe (Turkey)	Late Chalcolithic/Bronze Age	E. ferus	E. hemionus	Bavarian State Collection of Anthropology and Palaeoanatomy (SAPM), Munich, Germany	Joris Peters	H1
	NTI10263		distal radius	Norşun Tepe (Turkey)	Late Chalcolithic/Bronze Age	E. ferus	E. hemionus	Bavarian State Collection of Anthropology and Palaeoanatomy (SAPM), Munich, Germany	Joris Peters	H1
	NT 3		phalanx 2	Norşun Tepe (Turkey)	Late Chalcolithic/Bronze Age	E. ferus	no result	Bavarian State Collection of Anthropology and Palaeoanatomy (SAPM), Munich, Germany	Joris Peters
	LIDAR7	Areal Q50 Aushub 24Rg	talus	Lidar Höyük (Turkey)	Bronze Age	E. asinus	no result	Bavarian State Collection of Anthropology and Palaeoanatomy (SAPM), Munich, Germany	Joris Peters
	LIDAR8	Areal N49/50 Aushub 24.R.a 568	proximal radius	Lidar Höyük (Turkey)	Bronze Age	E. asinus	no result	Bavarian State Collection of Anthropology and Palaeoanatomy (SAPM), Munich, Germany	Joris Peters
	LIDAR6	Areal S46c Aushub 24 626	calcaneus	Lidar Höyük (Turkey)	Bronze Age	E. asinus	no result	Bavarian State Collection of Anthropology and Palaeoanatomy (SAPM), Munich, Germany	Joris Peters
	LIDAR9	MB Areal 050 Aushub 24 R.f.u.e	tibia	Lidar Höyük (Turkey)	Bronze Age	E. asinus	no result	Bavarian State Collection of Anthropology and Palaeoanatomy (SAPM), Munich, Germany	Joris Peters
	AC13332	Level XI (EBA)	tooth P3-4/ or M1-2/	Acem Höyük (Turkey)	~2500 BCE	E. asinus	E. hemionus	Department of Anthropology, University of North Carolina at Chapel Hill, USA	Ben Arbuckle	H1
	AC12216	Level V (MBA)	tooth M/3	Acem Höyük (Turkey)	~2000 BCE	E. asinus/E. hemionus?	E. hemionus	Department of Anthropology, University of North Carolina at Chapel Hill, USA	Ben Arbuckle	H1
	AC14269	Level XI	femur fragment	Acem Höyük (Turkey)	~2200 BCE	equus sp.	E. hemionus	Department of Anthropology, University of North Carolina at Chapel Hill, USA	Ben Arbuckle	H1
Balkan	KAB1	KII/2-1	diaphysis of metapodia	Kabazi II (Ukraine)	46,500 +/- 5,000 BP	E. hydruntinus	no result	Institut de Paléontologie humaine, Paris, France	Marylène Pathou-Mathis
	KAB2	KII/2-1	diaphysis of tibia	Kabazi II (Ukraine)	46,500 +/- 5,000 BP	E. hydruntinus	no result	Institut de Paléontologie humaine, Paris, France	Marylène Pathou-Mathis
	KAB3	KII/4E-8	upper jugal	Kabazi II (Ukraine)	46,500 +/- 5,000 BP	E. hydruntinus	no result	Institut de Paléontologie humaine, Paris, France	Marylène Pathou-Mathis
	KAB4	KII 87/88 II/3	tibia	Kabazi II (Ukraine)	46,500 +/- 5,000 BP	E. hydruntinus	no result	Institut de Paléontologie humaine, Paris, France	Marylène Pathou-Mathis
	KAB5	KII II/5	diaphysis of metapodia	Kabazi II (Ukraine)	46,500 +/- 5,000 BP	E. hydruntinus	no result	Institut de Paléontologie humaine, Paris, France	Marylène Pathou-Mathis
	KAB6	KII 88II/13U-8	upper jugal	Kabazi II (Ukraine)	46,500 +/- 5,000 BP	E. hydruntinus	no result	Institut de Paléontologie humaine, Paris, France	Marylène Pathou-Mathis
	Cheia1	Hamangia Culture, US 3094	left femur	Cheia (Romania)	Chalcolithic (~4,700 BCE)	E. hydruntinus	E. hemionus	National History Museum of Romania, National Centre of Pluridisciplinary Research, Bucarest, Romania	Adrian Bălăşescu	H1
	Cheia2	Hamangia Culture, US 3094	left femur	Cheia (Romania)	Chalcolithic (~4,700 BCE)	E. hydruntinus	no result	National History Museum of Romania, National Centre of Pluridisciplinary Research, Bucarest, Romania	Adrian Bălăşescu
	Cheia3	Hamangia Culture, US 3096	uper molar	Cheia (Romania)	Chalcolithic (~4,700 BCE)	E. hydruntinus/E. asinus	E. hemionus	National History Museum of Romania, National Centre of Pluridisciplinary Research, Bucarest, Romania	Adrian Bălăşescu	H1
	Cheia4	Hamangia Culture, US 3097	uper molar	Cheia (Romania)	Chalcolithic (~4,700 BCE)	E. hydruntinus/E. asinus	E. hemionus	National History Museum of Romania, National Centre of Pluridisciplinary Research, Bucarest, Romania	Adrian Bălăşescu	H1
	Cheia5	Hamangia Culture, US 3098	uper molar	Cheia (Romania)	Chalcolithic (~4,700 BCE)	E. hydruntinus/E. asinus or hemionus	E. hemionus	National History Museum of Romania, National Centre of Pluridisciplinary Research, Bucarest, Romania	Adrian Bălăşescu	H1
	Cheia6	US3099	right tibia	Cheia (Romania)	Chalcolithic (~4,700 BCE)	E. hydruntinus	no result	National History Museum of Romania, National Centre of Pluridisciplinary Research, Bucarest, Romania	Adrian Bălăşescu
	Cheia7	US3100	right tibia	Cheia (Romania)	Chalcolithic (~4,700 BCE)	E. hydruntinus	no result	National History Museum of Romania, National Centre of Pluridisciplinary Research, Bucarest, Romania	Adrian Bălăşescu
	GOMO1	GOMO-EQ01 Gomlav29/77	metatarsal	Gomolava (Serbia)	2157 ± 25 BP	E. hydruntinus or hemionus	E. caballus	University Tübingen, Zentrum für Naturwissenschaftliche Archäologie, Germany	Hans-Peter Uerpmann	E. caballus	E. caballus
	GOMO2	GOMO-EQ02 Gom12-278/71	humerus	Gomolava (Serbia)	~2,000-2,500 BP	E. hydruntinus or hemionus	E. caballus	University Tübingen, Zentrum für Naturwissenschaftliche Archäologie, Germany	Hans-Peter Uerpmann	E. caballus	E. caballus
	GOMO3	GOMO-EQ03 Gm13-D1/77-2	scapula	Gomolava (Serbia)	~2,000-2,500 BP	E. hydruntinus or hemionus	E. caballus	University Tübingen, Zentrum für Naturwissenschaftliche Archäologie, Germany	Hans-Peter Uerpmann	E. caballus	E. caballus
	SVOD1	SVOD-EQ01 SVLE5104-61	metacarpal	Svodin (Slovakia)	3,042 ± 25 BP	E. hydruntinus	E. caballus	University Tübingen, Zentrum für Naturwissenschaftliche Archäologie, Germany	Hans-Peter Uerpmann	E. caballus	E. caballus	E. caballus (Y3B17)
Western Europe	Lun I-1	LV.I.3.3973/P94-10-2	distal portion right tibia	Lunel-Viel (France)	c. 400,000 BP	E. hydruntinus	no result	Musée National de Préhistoire, Les Eyzies, France	Jean-Jacques Cleyet-Merle, Stéphane Madelaine
	Lun I-2	LV.I.5.4465/P94-10-2	distal portion right tibia	Lunel-Viel (France)	c. 400,000 BP	E. hydruntinus	no result	Musée National de Préhistoire, Les Eyzies, France	Jean-Jacques Cleyet-Merle, Stéphane Madelaine
	Lun I-3	LV.I.9.866/P94-10-2	distal portion metapodial	Lunel-Viel (France)	c. 400,000 BP	E. hydruntinus	no result	Musée National de Préhistoire, Les Eyzies, France	Jean-Jacques Cleyet-Merle, Stéphane Madelaine
	Lun I-4	LV.I.9.21082/P94-10-2	fragment scapula	Lunel-Viel (France)	c. 400,000 BP	E. hydruntinus	no result	Musée National de Préhistoire, Les Eyzies, France	Jean-Jacques Cleyet-Merle, Stéphane Madelaine
	Lun I-5	sans num	fragment ulna	Lunel-Viel (France)	c. 400,000 BP	E. hydruntinus	no result	Musée National de Préhistoire, Les Eyzies, France	Jean-Jacques Cleyet-Merle, Stéphane Madelaine
	Lun IV-1	LV.IV.14174/P94-10-2	distal portion right tibia	Lunel-Viel (France)	c. 400,000 BP	E. hydruntinus	no result	Musée National de Préhistoire, Les Eyzies, France	Jean-Jacques Cleyet-Merle, Stéphane Madelaine
	Lun IV-2	LV.IV.14137/P94-10-2	distal portion right tibia	Lunel-Viel (France)	c. 400,000 BP	E. hydruntinus	no result	Musée National de Préhistoire, Les Eyzies, France	Jean-Jacques Cleyet-Merle, Stéphane Madelaine
	Lun IV-3	LV.IV.15338/P94-10-2	distal portion metapodial	Lunel-Viel (France)	c. 400,000 BP	E. hydruntinus	no result	Musée National de Préhistoire, Les Eyzies, France	Jean-Jacques Cleyet-Merle, Stéphane Madelaine
	VS 31848	Villa Seckendorf 31848		Villa Seckendorf (Germany)	Würm	E. germanicus	no result	Rosenstein-Museum, Stuttgart, Germany	Reinhard Ziegler
	Seck01	Seck-EQ01	lower molar	Villa Seckendorf (Germany)	Würm	E. ferus	no result	Rosenstein-Museum, Stuttgart, Germany	Reinhard Ziegler
	Seck02	Seck-EQ02 SECK0006	lower molar	Villa Seckendorf (Germany)	Würm	E. hydruntinus	no result	Rosenstein-Museum, Stuttgart, Germany	Reinhard Ziegler
	SEq1	19B 121-1472 (échantillon 1) T.M. / 27 D-E / 0.5-0.8	M3	Spy (Belgium)	c. 40,000BP	E. sp.	no result	Royal Belgian Institute of Natural Sciences, Brussels, Belgium	Mietje Germonpré
	SEq2	19B 121-1472 (échantillons 3) T.H. / 27 D-E / 0.5-0.8	M3	Spy (Belgium)	c. 40,000BP	E. sp.	no result	Royal Belgian Institute of Natural Sciences, Brussels, Belgium	Mietje Germonpré
	SEq3	19B 122-1498 18921 (échantillon 4)	M3	Spy (Belgium)	c. 40,000BP	E. sp.	no result	Royal Belgian Institute of Natural Sciences, Brussels, Belgium	Mietje Germonpré
	SHyd1	19B 122-C27-Pl1489 (déblais inf.)	Tooth	Spy (Belgium)	c. 40,000BP	E. hydruntinus	no result	Royal Belgian Institute of Natural Sciences, Brussels, Belgium	Mietje Germonpré
	SHyd2	Tr122-C19B-Spy1953 C27 Tr.C. 0-0,8	Tooth	Spy (Belgium)	c. 40,000BP	E. hydruntinus/E. caballus/undeterminable	E. caballus	Royal Belgian Institute of Natural Sciences, Brussels, Belgium	Mietje Germonpré	E. caballus
	SHyd4	19B Tr121 Pl1470 Déblais inférieur 13A-E	lower P3/M2	Spy (Belgium)	c. 40,000BP	E. hydruntinus/undeterminable	E. caballus	Royal Belgian Institute of Natural Sciences, Brussels, Belgium	Mietje Germonpré	E. caballus
	SHyd5	19B Tr121 Pl1478 surface ancien sol de 14 à 1DE IG 17393	lower I3	Spy (Belgium)	c. 40,000BP	E. hydruntinus/undeterminable	E. caballus	Royal Belgian Institute of Natural Sciences, Brussels, Belgium	Mietje Germonpré	E. caballus
	SHyd7	19B Tr121 Pl1480 14 AE Déblais supérieur	lower M3	Spy (Belgium)	c. 40,000BP	E. hydruntinus/E. caballus	E. caballus	Royal Belgian Institute of Natural Sciences, Brussels, Belgium	Mietje Germonpré	E. caballus
	Laouz1		left lower third molar	Laouza Bayol (France)	34,500 +/- 2,000BP	E. hydruntinus	no result	LAMPEA, University Aix-Marseille, Aix-en-Provence, France	Maryline Rillardon
	Laouz2		lower first/second molar	Laouza Bayol (France)	35,500 +/- 2,000BP	E. hydruntinus	no result	LAMPEA, University Aix-Marseille, Aix-en-Provence, France	Maryline Rillardon
	Salp1		left lower third molar	Salpétrière (France)	28,180 +/- 1,000 BP	E. hydruntinus	no result	LAMPEA, University Aix-Marseille, Aix-en-Provence, France	Maryline Rillardon
	GRAL10	Q46 1961 n°1926		Le Gral (France)	< 30,000 - 20,000 BP	E. hydruntinus	no result	National History Museum, Geneva, Switzerland	Jean-Christophe Castel
	ARQ1	83716A	third molar	Aven de l'Arquet (France)	37,740 +/- 370BP	E. hydruntinus	no result	Musée d'Orgnac, France	Lydia Gamberi
	MARZ1	Marzal II 84	talus	Aven de Marzal II (France)	~22,000-20,000 BP	E. hydruntinus	no result	LAMPEA, University Aix-Marseille, Aix-en-Provence, France	Jean-Philippe Brugal
	TRCL1	96TDCI F13 SO4	right third molar	Trou du Cluzeau (France)	Pleistocene	E. hydruntinus	no result	LAMPEA, University Aix-Marseille, Aix-en-Provence, France	Jean-Philippe Brugal
	GRROC1	RCH 1003 d1	metatarsal	Grotte de Rochelot (France)	~100,000BP	E. hydruntinus	no result	Musée de Menton, France	Stéphane Hinguant, Pierre-Elie Moullé
	LACH160	Tranchée Maillard-2007 (160)	second right molar	Grotte La Chèvre (Bretagne, France)	Middle Pleistocene	E. süssenbornensis/E. caballus/undeterminable	E. caballus	Musée de Menton, France	Stéphane Hinguant, Pierre-Elie Moullé	E. caballus
	LACH157	décapage de surface (157)	Upper left premolar	Grotte La Chèvre (Bretagne, France)	Middle Pleistocene	E. süssenbornensis/E. caballus/undeterminable	no result	Musée de Menton, France	Stéphane Hinguant, Pierre-Elie Moullé
	LACH161	Eboulis Sud-TV (161)	tooth	Grotte La Chèvre (Bretagne, France)	Middle Pleistocene	E. süssenbornensis/E. caballus/undeterminable	no result	Musée de Menton, France	Stéphane Hinguant, Pierre-Elie Moullé
	LACH163	Couche 11.1-2008 (163)	tooth	Grotte La Chèvre (Bretagne, France)	Middle Pleistocene	E. süssenbornensis/E. caballus/undeterminable	no result	Musée de Menton, France	Stéphane Hinguant, Pierre-Elie Moullé
	Roc	Couche 4.3-2974	tooth	Grotte de Rochefort (Bretagne, France)	Solutrean	E. hydruntinus/E. caballus	E. caballus	Musée de Menton, France	Stéphane Hinguant, Pierre-Elie Moullé	E. caballus
	ARTE1	ART97CDO D25 dec6 203	metacarpal	Grotte d'Artenac (16) Charente, France)	Stade isotopique 5 (~100,000 BP)	E. hydruntinus	E. hemionus	Musée d'Angoulême, France	Jean-François Tournepiche	H2
	Quer1	Qer Son 412	femur	Grotte de Quéroy Charente, France)	~12,700 BP	E. hydruntinus	E. hemionus	Musée d'Angoulême, France	Jean-François Tournepiche	H1
	FonPi1	1PTpila06 K10c c.4dec 13a	phalanx 2	La Fontaine du Pila (France)	~11,500 BP	E. hydruntinus	no result	LAMPEA, University Aix-Marseille, Aix-en-Provence, France	Maryline Rillardon
	Esqu1	I22 29	naviculus	Esquicho Grapaou (Portugal)	~35,000 BP	E. hydruntinus	no result	LAMPEA, University Aix-Marseille, Aix-en-Provence, France	Maryline Rillardon
	Esqu2	ESQ PS74	big right sesamoid	Esquicho Grapaou (Portugal)	~36,000 BP	E. hydruntinus	no result	LAMPEA, University Aix-Marseille, Aix-en-Provence, France	Maryline Rillardon
	Cal		terminal phalanx	Caldeirão (Portugal)	22,000 - 18,000 BP	E. hydruntinus	no result	LAMPEA, University Aix-Marseille, Aix-en-Provence, France	Jean-Philippe Brugal
	STC1	ST06 PL 4195-29BT11	tooth	San Teodoro (Italy)	14,000-11,000 BP	E. hydruntinus	no result	Università degli Studi di Messina, S. Agata, Italy	Gabriella Magnano
	STC2	ST06 PL 4877-32G	tooth	San Teodoro (Italy)	14,000-11,000 BP	E. hydruntinus	no result	Università degli Studi di Messina, S. Agata, Italy	Gabriella Magnano
	STC3	ST06 PL 4877-32G	tooth	San Teodoro (Italy)	14,000-11,000 BP	E. hydruntinus	no result	Università degli Studi di Messina, S. Agata, Italy	Gabriella Magnano
	STC4	ST05 PL2221-30CT11	tooth	San Teodoro (Italy)	14,000-11,000 BP	E. hydruntinus	no result	Università degli Studi di Messina, S. Agata, Italy	Gabriella Magnano
	STC5	ST05 PL2033-31ATg5	tooth	San Teodoro (Italy)	14,000-11,000 BP	E. hydruntinus	no result	Università degli Studi di Messina, S. Agata, Italy	Gabriella Magnano
	STC6	ST05 PL2136-29AT10	tooth	San Teodoro (Italy)	14,000-11,000 BP	E. hydruntinus	no result	Università degli Studi di Messina, S. Agata, Italy	Gabriella Magnano
	STC7	ST05 PL2131-29 ATg10	tooth	San Teodoro (Italy)	14,000-11,000 BP	E. hydruntinus	no result	Università degli Studi di Messina, S. Agata, Italy	Gabriella Magnano
	STC8	ST098 PL4162-9ET11	metacarpal	San Teodoro (Italy)	14,000-11,000 BP	E. hydruntinus	no result	Università degli Studi di Messina, S. Agata, Italy	Gabriella Magnano
	STC9	ST098 PL2428-9FT8	mandible	San Teodoro (Italy)	14,000-11,000 BP	E. hydruntinus	no result	Università degli Studi di Messina, S. Agata, Italy	Gabriella Magnano
	Alb1	Zone: Muralla (defensive wall)-Corte 1	Lower right molar M3	Morra del Quintanar Munera (Spain)	Bronze Age	E. hydruntinus/E. caballus	E. caballus	Laboratory of Archaeozoology, Dept. Biologia, Universidad Autonoma de Madrid, Spain	Arturo Morales-Muniz			E. caballus (Y3B8)
						*performed prior and during the study in the absence of genetic information						$data not shown

## Sheet: Table B
Primers used to amplify mitochondrial sequences.
		Size of product
Primer name	Sequence	without primers (bp)
EA1	CTTGATTTCTTCCCCTAAACGAC	345
EA6	GAAAGAACCAGATGCCAGGTATAG
EAinsF	TCCATCCCCATGTGCTATGTCAGT	26
EAinsR	CAATTTAATGCACGATGTACATAGGGTATT
UppHem	CATCCCCATGTGCTATGTCAGT	66
Low3	AAATGATATTATGTACATGCTTATTATTC
Upp31	TGCTATGTCAGTATTAAAATACACC	52
Low32	AATAGTATGTACATGCTTGTTATTCA
UppC3	GCCCCATGAATAATAAGCATGTA	61
LowC3	CGTGTTGACTGGAAATGATTTGA
UppC2	CCCATGAATAATAAGCATGTACATAA	57
LowC2	CGTGTTGACTGGAAATGATTTG
UppC2	CCCATGAATAATAAGCATGTACATAA	109
LowC1	ATTTCCCGCGGCTTGGTGA
EA51	CATCCAAGTCAAATCATTTCCA	44
EA61	CTGATTTCCCGCGGCTT
EA7	ATGTTCCACGAGCTTAATCACC	66
EA8	GTTTCATTGTAGAAACCCCCAC
EA53	TGTCCCAATCCTCGCTCC	35
EA6	GAAAGAACCAGATGCCAGGTATAG
EA53	TGTCCCAATCCTCGCTCC	47
EA63	GCCCTGAAGAAAGAACCAGA

## Sheet: Table C
Description of published sequences used
Sample	Description	Sample place	studbook Nr	origin maternal lineage	place of birth	Haplogroup	Authors	Reference
Onager3 AF220937	Equus hemionus isolate onager 3 mitochondrial control region	San Diego zoo	Pers18	Iran (mother captured in Iran)	Hamburg	TI*	Oakenfull,E.A., Lim,H.N. and Ryder,O.A., 2000	Conserv. Genet. 1, 341-355 (2000)
Kulan1 AF220934	Equus hemionus isolate kulan 1 mitochondrial control region	San Diego zoo	68 SU37/Ko2	Turkmenistan (mother captured in Turkmenistan)	Kolmarden, Sweden	I	Oakenfull,E.A., Lim,H.N. and Ryder,O.A., 2000	Conserv. Genet. 1, 341-355 (2000)
Kulan2 AF220936	Equus hemionus isolate kulan 2 mitochondrial control region	San Diego zoo	28 W SU16/Be10	Turkmenistan (mother captured in Turkmenistan)	Berlin/Tiergarten	TI	Oakenfull,E.A., Lim,H.N. and Ryder,O.A., 2000	Conserv. Genet. 1, 341-355 (2000)
Kulan3 AF220935	Equus hemionus isolate kulan 3 mitochondrial control region	San Diego zoo	192 SU60/Be35	Turkmenistan (mother captured in Turkmenistan)	Berlin/Tiergarten	I	Oakenfull,E.A., Lim,H.N. and Ryder,O.A., 2000	Conserv. Genet. 1, 341-355 (2000)
Kiang1 AF220932	Equus kiang isolate kiang 1 mitochondrial control region.	unknown				KD	Oakenfull,E.A., Lim,H.N. and Ryder,O.A., 2000	Conserv. Genet. 1, 341-355 (2000)
Kiang2 AF220933	Equus kiang isolate kiang 2 mitochondrial control region.	Tierpark Berlin, Germany	39	China (mother captured in China)	China	KD	Oakenfull,E.A., Lim,H.N. and Ryder,O.A., 2000	Conserv. Genet. 1, 341-355 (2000)
Kiang_H1 AY569539	Equus kiang haplotype H1 control region	North of Tibet (wild)				KD	Beja-Pereira et al., 2004	Science, 304: 1781 (2004)
Kiang_H3 AY569540	Equus kiang haplotype H3 control region	North of Tibet (wild)				KD	Beja-Pereira et al., 2004	Science, 304: 1781 (2004)
Kiang_H4 AY569541	Equus kiang haplotype H4 control region	North of Tibet (wild)				KD	Beja-Pereira et al., 2004	Science, 304: 1781 (2004)
Kiang_H5 AY569542	Equus kiang haplotype H5 control region	North of Tibet (wild)				KD	Beja-Pereira et al., 2004	Science, 304: 1781 (2004)
Hemionus luteus AY569551	Equus hemionus luteus	southwest Mongolia				D	Beja-Pereira et al., 2004	Science, 304: 1781 (2004)
Kiang_HM118851	Equus hemionus kiang mitochondrion	Kunlun mountains, southern Tibet				K	Luo et al., 2011	Mitochondrial DNA 22 (1-2), 6-8 (2011)
Kiang_JX312731	Equus kiang isolate K41 mitochondrion	Tierpark Berlin, Germany	Riga31	China (grandmother captured in China, mother in Riga)	Riga	K	Vilstrup et al, 2013	PLoS ONE 8 (2), E55950 (2013)
Kiang_JX312732	Equus kiang isolate K32 mitochondrion	Tierpark Berlin, Germany	Riga27	China (grandmother captured in China, mother in Riga)	Riga	KD	Vilstrup et al, 2013	PLoS ONE 8 (2), E55950 (2013)
Kulan_JX312728	Equus hemionus kulan isolate E hemionus mitochondrion	Kolmarden Zoo, Sweden	J-Lo 1652	Turkmenistan (5 generations backwards)	Hodenhagen	TI	Vilstrup et al, 2013	PLoS ONE 8 (2), E55950 (2013)
Onager_JX312730	Equus hemionus onager isolate O91 mitochondrion	Reepark Ebeltoft, Denmark	818 Montp33	Iran (mother captured in Iran)	Montpellier	CI	Vilstrup et al, 2013	PLoS ONE 8 (2), E55950 (2013)
KP825311, 13, 14	Equus hemionus onager	Iran (Turan and Bahram-e Goor reserves, wild)		Iran		I	Rosenbom et al, 2015	Mol. Phyl. Evol., 85, 88-96
KP825312	Equus hemionus onager	Iran (Turan and Bahram-e Goor reserves, wild)		Iran		TI*	Rosenbom et al, 2015	Mol. Phyl. Evol., 85, 88-96
KP825318	Equus hemionus hemionus	China, Xinjiang, Kalamaili, wild		China (Xinjiang)		D1	Rosenbom et al, 2015	Mol. Phyl. Evol., 85, 88-96
KP825316, 17, 19	Equus hemionus hemionus	China, Xinjiang, Kalamaili, wild		China (Xinjiang)		D2	Rosenbom et al, 2015	Mol. Phyl. Evol., 85, 88-96
KP825315, 20	Equus hemionus hemionus	China, Xinjiang, Kalamaili, wild		China (Xinjiang)		KD	Rosenbom et al, 2015	Mol. Phyl. Evol., 85, 88-96
KP825321-26	Equus kiang	southern Tibet (Nyalam, Gyirong, Ngamring and Tingri reserves)		China (Tibet)		K	Rosenbom et al, 2015	Mol. Phyl. Evol., 85, 88-96
CH28_SAZA GQ3246	E. hemionus CH28	Sagzabad, Iran, 1st-2d millennium BCE, wild				CI	Orlando et al., 2009	PNAS 106(51):21754-21759 (2009)
CH561_GQ324610	E. hydruntinus	Scladina cave, Belgium, layer 1a, 30-40000 BP, sample SC81126				H1	Orlando et al., 2009	PNAS 106(51):21754-21759 (2009)

## Sheet: Table D
Sample location and results of sPCA analysis
sPCA scores, RGB and GPS values for each individual shown in the phylogenetic tree.
The sPCA scores correspond to the first three axes, as well as the last (36th) one
The RGB values are derived from an analysis that took into account only the first three axes.
	GPS values
Name	East	North	sPCA Axis 1	sPCA Axis 2	sPCA Axis 3	sPCA Axis 36	red (Axis 1)	green (Axis 2)	blue (Axis 3)
KuGobiA1_0	96.8205	44.5909	-2.27334249	-0.40419433	0.21945314	0.07692023	7	152	78
Ku.GobiA4_0	96.7008	44.3860	-2.41668222	1.52654862	-0.71117358	0.7560571	0	248	31
Ku.GobiB8_0	93.1385	45.3479	-2.41668222	1.52654862	-0.71117358	0.7560571	0	248	31
Ku.GobiS16_0	106.4503	42.9379	-2.41668222	1.52654862	-0.71117358	0.7560571	0	248	31
Ku.GobiB19_0	93.4057	45.1848	-2.33620345	1.6636554	-1.1669426	0.394811	4	255	9
Ku.GobiB20_0	93.6253	45.3430	-2.33620345	1.6636554	-1.1669426	0.394811	4	255	9
Ku.GobiA5_0	96.7007	44.3859	-2.36783549	1.55960405	-1.01059346	0.4022531	2	250	16
Ku.GobiA10_0	96.7009	44.3861	-2.04904152	0.88996862	0.42057692	2.06972454	18	216	88
Ku.GobiB3_0	92.3212	45.4897	-2.31200994	1.0607332	0.2191511	2.19042412	5	225	78
Ku.GobiS33_0	109.9282	43.8575	-2.31200994	1.0607332	0.2191511	2.19042412	5	225	78
Ku.GobiB6_0	93.3161	45.3983	-2.36905482	1.09751639	0.18083253	2.29464837	2	227	76
Ku.GobiS15_0	106.4720	42.9153	-2.28156836	1.04891404	0.23410936	2.1217253	7	224	79
Ku.gobiA2_0	97.7777	43.3128	-0.68240102	-0.3352221	-0.28624076	-2.76161974	87	155	53
Ku.gobiS27_0	109.6974	44.0778	-0.35092025	-0.54448222	-0.50381354	-2.88868837	103	145	42
Ku.gobiS61_0	109.0075	44.0910	-0.35092025	-0.54448222	-0.50381354	-2.88868837	103	145	42
Ku.gobiS13_0	106.4687	42.9104	-0.35092025	-0.54448222	-0.50381354	-2.88868837	103	145	42
hemionus_luteus_0	91.0333	45.0667	-0.35092025	-0.54448222	-0.50381354	-2.88868837	103	145	42
ARTE1_100000	0.1525	45.0014	-0.82499483	-0.07449245	1.40416622	-0.14611132	80	168	137
Kiang.Sigean_0	93.4000	35.5000	-1.23310243	1.10924475	-0.24086323	0.38446077	59	227	55
Kiang2_AF220933_0	93.4000	35.5000	-2.1324115	1.14093191	0.02843623	0.8876372	14	229	68
kiang_H1_AY569539_0	93.4000	35.5000	-2.41668222	1.52654862	-0.71117358	0.7560571	0	248	31
kiang_H3_AY569540_0	93.4000	35.5000	-2.41668222	1.52654862	-0.71117358	0.7560571	0	248	31
kiang_H4_AY569541_0	93.4000	35.5000	-2.33620345	1.6636554	-1.1669426	0.394811	4	255	9
kiang_H5_AY569542_0	93.4000	35.5000	-2.33620345	1.6636554	-1.1669426	0.394811	4	255	9
Ki.1946.NMW_66	93.4000	35.5000	-1.41201585	0.77468052	-0.82551937	0.67509531	50	211	26
Kiang-JX312731_0	93.4000	35.5000	-1.47699266	0.99726537	0.18656912	0.64791081	47	222	76
Ki.MNHN.1899_113	93.4000	35.5000	-2.27087482	1.2193193	-0.00906976	1.29543821	7	233	66
Kiang_HM118851_0	93.4000	35.5000	-2.27087482	1.2193193	-0.00906976	1.29543821	7	233	66
Kiang-JX312732_0	93.4000	35.5000	-2.1324115	1.14093191	0.02843623	0.8876372	14	229	68
Kiang1_AF220932_0	93.4000	35.5000	-2.1060864	0.92675181	0.38225835	2.17394879	16	218	86
CH28_QG_324612_7500	49.9379	35.7696	0.54154417	-3.30612014	-1.25609079	-0.3935759	148	6	4
SAZA2_3500	49.9380	35.7697	0.54491399	-0.02939275	-0.40531726	-0.01124676	148	170	47
Khart1_15	54.3675	31.8972	2.46721288	0.98652705	-0.41811214	-0.29762842	244	221	46
Khart3_15	54.3679	31.8976	2.46721288	0.98652705	-0.41811214	-0.29762842	244	221	46
Khart2_15	54.3680	31.8977	2.46721288	0.98652705	-0.41811214	-0.29762842	244	221	46
On.Sigean_0	54.3674	31.8971	2.46721288	0.98652705	-0.41811214	-0.29762842	244	221	46
DEKH1_7000	54.0511	35.1172	2.62717903	1.19164286	-0.02688449	0.01008435	252	231	66
ZAGH2_7500	48.0336	33.1517	2.46721288	0.98652705	-0.41811214	-0.29762842	244	221	46
ZAGH4_7500	48.0337	33.1518	0.54154417	-3.30612014	-1.25609079	-0.3935759	148	6	4
MARAL1_6500	50.0350	35.1522	0.54154417	-3.30612014	-1.25609079	-0.3935759	148	6	4
MARAL2_6500	50.0351	35.1523	0.50991213	-3.41017149	-1.09974165	-0.3861338	146	1	12
SAZA7_3500	49.9381	35.7698	0.55916082	-3.43443262	-1.3384828	-0.34174649	149	0	0
SAZA6_3500	49.9378	35.7695	0.55916082	-3.43443262	-1.3384828	-0.34174649	149	0	0
JARIA1_6030	49.0000	30.0333	-1.02782151	-0.57994205	0.52232331	-0.2415147	69	143	93
SAZA4_3500	49.9377	35.7694	-1.05945354	-0.68399341	0.67867245	-0.2340726	68	138	101
Onager3_AF220937	54.3676	31.8973	-1.05945354	-0.68399341	0.67867245	-0.2340726	68	138	101
He1909.MNHN_103	54.3677	31.8974	-0.97363686	-0.37830088	0.09150155	-0.66806403	72	153	72
On.BIG1_0	54.0000	29.0500	2.46721288	0.98652705	-0.41811214	-0.29762842	244	221	46
On.BIG11_0	54.0001	29.0501	2.46721288	0.98652705	-0.41811214	-0.29762842	244	221	46
On.BIG2_0	54.0002	29.0502	2.62717903	1.19164286	-0.02688449	0.01008435	252	231	66
On.BIG3_0	54.0003	29.0503	2.62717903	1.19164286	-0.02688449	0.01008435	252	231	66
On.BIG4_0	54.0004	29.0504	2.62717903	1.19164286	-0.02688449	0.01008435	252	231	66
On.BIG5_0	54.0005	29.0505	2.62717903	1.19164286	-0.02688449	0.01008435	252	231	66
On.BIG6_0	54.0006	29.0506	2.62717903	1.19164286	-0.02688449	0.01008435	252	231	66
On.BIG7_0	54.0007	29.0507	2.62717903	1.19164286	-0.02688449	0.01008435	252	231	66
On.BIG8_0	54.0008	29.0508	2.62717903	1.19164286	-0.02688449	0.01008435	252	231	66
On.BIG9_0	54.0009	29.0509	2.62717903	1.19164286	-0.02688449	0.01008435	252	231	66
On.BIG10_0	54.0010	29.0510	2.62717903	1.19164286	-0.02688449	0.01008435	252	231	66
On.BIG12_0	54.0011	29.0511	2.62717903	1.19164286	-0.02688449	0.01008435	252	231	66
On.BIG13_0	54.0012	29.0512	2.62717903	1.19164286	-0.02688449	0.01008435	252	231	66
Isr.F1_0	58.3050	33.5400	2.62717903	1.19164286	-0.02688449	0.01008435	252	231	66
Isr.F4_0	58.3051	33.5401	2.62717903	1.19164286	-0.02688449	0.01008435	252	231	66
Isr.F5_0	58.3052	33.5402	2.62717903	1.19164286	-0.02688449	0.01008435	252	231	66
Isr.F7_0	58.3053	33.5403	2.62717903	1.19164286	-0.02688449	0.01008435	252	231	66
Isr.M1_0	58.3054	33.5404	2.62717903	1.19164286	-0.02688449	0.01008435	252	231	66
Isr.M11_0	58.3055	33.5405	2.62717903	1.19164286	-0.02688449	0.01008435	252	231	66
TQ3_3500	46.3827	41.0028	0.5101032	-3.06787444	-1.10490538	-0.50146497	146	18	12
S1_5000	44.3100	40.1100	0.5101032	-3.06787444	-1.10490538	-0.50146497	146	18	12
S2_5000	44.3101	40.1101	0.5101032	-3.06787444	-1.10490538	-0.50146497	146	18	12
DAG1_4500	48.0353	42.1115	0.26599501	-3.30393972	-1.14529854	-0.12644072	134	7	10
DAG2_4500	48.0354	42.1116	0.26599501	-3.30393972	-1.14529854	-0.12644072	134	7	10
Onager-JX312730_	54.3678	31.8975	0.26599501	-3.30393972	-1.14529854	-0.12644072	134	7	10
Kulan1_AF220934	62.2400	35.1800	2.64971594	1.19870161	-0.03149345	0.01497211	253	232	65
Kulan3_AF220935	62.2401	35.1801	2.62717903	1.19164286	-0.02688449	0.01008435	252	231	66
Kulan2_AF220936	62.2402	35.1802	-0.49385318	-0.06164978	-0.12916358	-0.08659055	96	169	60
Kulan_JX312728_0	62.2403	35.1803	-0.49385318	-0.06164978	-0.12916358	-0.08659055	96	169	60
Isr.F11_0	58.3056	33.5406	-0.49385318	-0.06164978	-0.12916358	-0.08659055	96	169	60
Isr.M16_0	58.3057	33.5407	-0.49385318	-0.06164978	-0.12916358	-0.08659055	96	169	60
Isr.M17_0	58.3058	33.5408	-0.49385318	-0.06164978	-0.12916358	-0.08659055	96	169	60
Isr.F10_0	58.3059	33.5409	-0.51514431	-0.08229311	-0.12822998	-0.08592751	95	168	61
Isr.F2_0	58.3060	33.5410	-0.51514431	-0.08229311	-0.12822998	-0.08592751	95	168	61
Isr.F3_0	58.3061	33.5411	-0.51514431	-0.08229311	-0.12822998	-0.08592751	95	168	61
Isr.F8_0	58.3062	33.5412	-0.51514431	-0.08229311	-0.12822998	-0.08592751	95	168	61
Isr.F9_0	58.3063	33.5413	-0.51514431	-0.08229311	-0.12822998	-0.08592751	95	168	61
Isr.M18_0	58.31	33.54	-0.515	-0.082	-0.128	-0.086	95	168	61
Isr.M3_0	58.31	33.54	-0.515	-0.082	-0.128	-0.086	95	168	61
Isr.M5_0	58.31	33.54	-0.515	-0.082	-0.128	-0.086	95	168	61
K1_5000	30.31	39.46	-0.939	-0.256	3.297	-0.056	74	159	232
K3_5000	30.31	39.46	-0.939	-0.256	3.297	-0.056	74	159	232
K2_5000	30.31	39.46	-0.455	-0.093	3.310	0.128	98	167	233
KSK4_8000	34.41	37.55	-0.455	-0.093	3.310	0.128	98	167	233
KSK7_8000	34.41	37.55	-0.939	-0.256	3.297	-0.056	74	159	232
KSK6_8000	34.41	37.55	-1.536	-0.703	2.530	-0.396	44	137	194
KSK8_8000	34.41	37.55	-0.455	-0.093	3.310	0.128	98	167	233
CHEIA5_7000	26.10	44.56	-1.426	-0.430	2.565	-0.012	50	150	195
MUNB1_4000	38.00	36.00	-0.479	-1.994	-0.106	-0.187	97	72	62
MUNB6_4000	38.00	36.00	-0.928	-1.765	0.033	-0.463	74	84	69
Hm.1864.NMW_148	37.90	36.12	-0.055	-1.900	-0.123	-0.063	118	77	61
Hm1929.NMW_83	37.90	36.12	-0.055	-1.900	-0.123	-0.063	118	77	61
Hm1865.MNHN_147	37.90	36.12	-0.055	-1.900	-0.123	-0.063	118	77	61
He1902.MNHN_110	37.90	36.12	-0.055	-1.900	-0.123	-0.063	118	77	61
Kh.A2313.MNHN.1838_174	71.46	22.99	-0.693	-0.642	1.107	-0.634	86	140	122
Kh.A549.MNHN.1849_163	71.46	22.99	-0.448	-0.472	1.511	-0.242	98	148	143

## Sheet: Table E
Summary statistics for the kiangs and dziggetais of the K and KD clades using the 296 bp HVR sequence
Measurements of intrapopulation diversity
Population	Nind	Nhap	Haplotype diversity	Nucleotide diversity, Pi	Theta(k)	Theta(S)	Theta(Pi)	Theta (per site)
Dziggetai	13	7	0.87 ± 0.07	0.015 ± 0.009	5.43	3.22± 1.53	4,51 ± 2.67	0.012
Kiang	17	12	0.96 ± 0.03	0.023 ± 0.013	16.80	5.32 ± 2.20	6.90 ± 3.82	0.018
Nind: number of individuals, Nhap: number of haplotypes. The ± indicates the standard deviation. These summary statistics were calculated using Arlequin and DNAsp.
The Fst value between Kiang (Tibet) and Dziggetai (Gobi) of the K/KD clades is 0.2018 (Pval=0.00901 ± 0.0091).
The pairwise nucleotide divergence (average number of nucleotide substitution per site) with Jukes and Cantor correction, Dxy(JC) between Kiang (Tibet) and Dziggetai (Gobi) of the K/KD clades is 0,02302 , whereas the net pairwise nucleotide divergence (net average number of nucleotide substitution per site) with Jukes and Cantor correction, Da(JC) is 0,00500.

## Sheet: Table F
code IJM	archaeological code	Characteristics, measurements (mm) and zoological assignment of samples from Iranian archeological sites
		name of site	Period	skeletal part	side	Occlusal length	Occlusal breadth	Protocone length	Paraflexid length	caballin fold	zoo assignment
SAZA1	SAG'OXXI/3 Pit2	Sagzabad	2,000-1,000 BCE	Lower molar							small equid
SAZA2	SAG'TrA LVII 1349 (S61)	Sagzabad	2,000-1,000 BCE	Upper molar			13	12	9	No	small equid
SAZA3	SAG' TrXX2 (S45)	Sagzabad	2,000-1,000 BCE	Right Mandible with P2.3.4							small equid
SAZA4	SAG'0XXI2 L.VI1353 (S29)	Sagzabad	2,000-1,000 BCE	Upper third molar	L	23	24	9.6	10.1		E. asinus
SAZA5	SAG'TrA LVII (S61)	Sagzabad	2,000-1,000 BCE	tooth							E. asinus
SAZA6	SAG'0XX1/3 Pit2 1353 (S19)	Sagzabad	2,000-1,000 BCE	Upper molar	R	22	23	9.5	10		E. asinus
SAZA7	SAG'OXX 1/3 Pit2 1353 (S23)	Sagzabad	2,000-1,000 BCE	molar	L	25	23.5	9.5	10		small equid
QABR1	SC 25	Qabrestan	4,000 BCE	Tooth	R	25	13	14.5	11.5		small equid
QABR2	SC 301 (SC1)	Qabrestan	4,000 BCE	Upper molar		23.4	25.4	11.2		No	E.hemionus
QABR3	SCN IX G43 II 35-53 (SC15)	Qabrestan	4,000 BCE	Upper molar		22	23.5	10.3		No	E.hemionus
QABR4	SCM A50 (SC12)	Qabrestan	4,000 BCE	molar		23.4	25.4	11.2		No	E.hemionus
ZAGH1	ZA 1354 Tr GIX (T10)	Zagheh	6,000-5,000 BCE	Upper molar	R	23	22.7	12			E.hemionus*
ZAGH2	TZ (T3)	Zagheh	6,000-5,000 BCE	Upper molar	R	22	24	10.6		No	E.hemionus
ZAGH3	TZ (T5)	Zagheh	6,000-5,000 BCE	tooth		26.5	25	11			E.hemionus
ZAGH4	ZADIX 70-90 CB5	Zagheh	6,000-5,000 BCE	Upper molar		22.7	25.4	12	12.5		E.hemionus
DEKH1	TT4 Loc 405	Deh Kheir	late Neolithic	Second posterior phalanx	mes 1 VE = 76.4	mes 2 VE = 73.4	mes 1 VE =26.3	mes 7 VE = 44.8	mes 14 VE =35.3		E.hemionus
MARAL1	AT45 depth 10-55 30.6.80	Maral Tepe	5,000-4,000 BCE	First anterior Phalanx							E. asinus
MARAL2	AT47.400 depth 107-127 26.6.80	Maral Tepe	5,000-4,000 BCE	First posterior phalanx							E. asinus
QB1		Qaleh Bozi	~40,000 BP	Tooth							E. cf hemionus
QB2		Qaleh Bozi	~40,000 BP	Tooth							E. cf hydruntinus
QB3		Qaleh Bozi	89 BP	Tooth							E. hemionus/ E. caballus
QB4		Qaleh Bozi	~40,000 BP	Tooth
QB5		Qaleh Bozi	~40,000 BP	Tooth							E.hemionus/E. caballus
QB6		Qaleh Bozi	~40,000 BP	Tooth							E. hemionus/ hemippus
QB7		Qaleh Bozi	~40,000 BP	Tooth							E. cf hydruntinus
QB8		Qaleh Bozi	~40,000 BP	Tooth
QB9		Qaleh Bozi	~40,000 BP	Tooth							E.cf. asinus
QB10		Qaleh Bozi	~40,000 BP	Tooth							Small
QB11		Qaleh Bozi	~40,000 BP	Tooth							E. cf caballus
QB12		Qaleh Bozi	~40,000 BP	Tooth							E. hemionus
QB13		Qaleh Bozi	~40,000 BP	Tooth							E. cf hemionus
QB14		Qaleh Bozi	~40,000 BP	Tooth							Small
QB15		Qaleh Bozi	~40,000 BP	Tooth							E. cf caballus
Mush1	2MS-39	Tall-i-Mushki	~8,000 BP	Talus							E. hemionus
Mush2	2MS-235-37	Tall-i-Mushki	~8,000 BP								E. hemionus
Mush3	2MS-38-11	Tall-i-Mushki	~8,000 BP	Lower molar							E. hemionus
Mush4	2MS 150-4	Tall-i-Mushki	~8,000 BP	Lower molar							E. hemionus
Sial	A(2)PeriodIII/1120-130	Sialk	~8,000 BP	Incisor							n.d.
JARIA1	JA-A-4b	Tall-i-JariA	~6,000 BCE	Distal tibia							E. asinus
JARIA2	JA-E-7	Tall-i-JariA	~6,000 BCE	tibia							E. asinus
JARIA3	JA-F(4F)	Tall-i-JariA	~6,000 BCE	tibia							E. asinus
JARIA4	JA-A-11	Tall-i-JariA	6030 ± 30 BCE	Third lower molar							E. cf hydruntinus
JARIA5	JA-D5	Tall-i-JariA	~6,000 BCE	Upper molar							E. asinus
ChGa1	Choga Gavaneh	CG’ST1Loc202	Bronze Age	radius							Small

## Sheet: Table G
Comparison of measurements from the sample DAG2 from Daghestan-Velikent with those from other hemiones and a kiang
		Posterior	Posterior	Posterior	Posterior
			M	M	M
		Daghestan DAG2 -Phalanx	NY 57201	NY 57212	BM 976e
		1750 BCE	E. h. hemionus	E. h. hemionus	E. kiang
		Velikent	HM 14	HM 16	K 5
Greatest length of trigonum phalangis	7	49	51	53	48
Greatest length	1	80	77	77	80
Smallest breadth	3	28.5	26	25.5	25.5
Proximal breadth	4	45.5	41	41	41.5
Proximal depth	5	35	32	34	33.5
Distal supra-articular breadth	6	38.2	36.5	36.5	35.5
Distal articular breadth	14	35	34	33.2	33.5
Medial supratuberosital length	10	60	55	57	61
Medial infratuberosital length	12	12.7	15	12	11.5
Log10(E.h.o)		Velikent	NY 57201	NY 57212	BM 976e
1.682	7	0.008	0.026	0.042	-0.001
1.884	1	0.019	0.002	0.002	0.019
1.390	3	0.065	0.025	0.017	0.017
1.614	4	0.044	-0.001	-0.001	0.004
1.489	5	0.055	0.016	0.042	0.036
1.564	6	0.018	-0.002	-0.002	-0.014
1.551	14	-0.007	-0.020	-0.030	-0.026
1.767	10	0.011	-0.027	-0.011	0.018
1.014	12	0.090	0.162	0.065	0.047
measurements (mm) according to Eisenmann V (1986) Comparative Osteology of Modern and Fossil Horses, Half-asses, and Asses. In: Meadow RH, Uerpmann HP, editors. Equids in the Ancient World (Beihefte zum Tübinger Atlas des Vorderen Orients, Reihe A, Nr 19/1). Wiesbaden: Dr. Ludwig Reichert Verlag. pp. 67-116.

## Sheet: Table H
Comparative measurements of skeletal parts of late and Bronze Age E. hemionus hemippus
	Vera Eisenmann
	705b
	Syria	Deserts Syria
	F	F	???	F
	10	10	100	10
	BM 1867.12.3.1	AC 65	YA 1637	MCZ 6345
	HS 1	HS 2	HS 3	HS 5
	tibia
1= Greatest length	270	267	263.5	291
2' = Medial length				275
2 = Lateral length	260	245	254.5
3 = Smallest breadth	31	29	28.1	33
4= Smallest depth	22	22.5	22	23
5 = Proximal breadth	73.5	70.1	70	72	Munb2
6 = Proximal depth	65	65	65	64
7 = Distal breadth	53.5	52	58	53.5	58.4
8 = Distal depth	36.5	38	37.1	37	39.3
9 = Length of fossa digitalis	38.5	35.5	33	37
10 = Breadth of fossa digitalis	12.5	12	14	13
	radius
1 = Greatest length	260	254	252	272
2 = Lateral length				265
2' medial length	247	243	242
3 = Smallest breadth	29	27	27.5	29
4' = Smallest depth			17	20.5
4 = Greatest proximal breadth	62	58.6	61	61
5= Proximal articular breadth	57	56.1	56	56	Munb 1	Hm1929_
						NMW5493
6 = Proximal articular depth	27.6	26.8	30	31		Ra le	Ra ri
7 = Greatest distal breadth	53.5	52.6	54	56	58.5	55.2	54.9
8 = Distal articular breadth	48	45.2	49.2	48	49.8	48.4	48.9
9 = Distal articular depth	28.5	27.5	31	31	31.1	29.2	29.3
10 = Breadth of medial condyle	21	18.6	22	23	21.2	21.3	21.2
11 = Breadth of lateral condyle	10.5	10.5	12	12
	humerus
1 = Greatest length	217	213	209	227
2 = Posterior length	202	193	196	210
3= Smallest Breadth	25	24.4	24	25
4 = Depth at the same level				33
5 = Proximal breadth	66	65	65	71	Munb6
6 = Proximal depth	69.5	75	70	72
7 = Distal breadth	58	57	58	59	60.1
8 = Distal medial depth	61.5	59.6	68	62	56.9
9 = Height of medial condfyle				39
10 = Smallest height of the trochlea	27.7	27.2	28	30	28.9
11 = Height of the trochlea				35.5	34.6
Comparative measurements of three skeletal parts from historical specimens of E. hemionus hemippus from the Syrian deserts and conserved in the National Museum of Natural History in Paris (MNHN, measured by V. Eisenmann, http://www.vera-eisenmann.com/spip.php?page=recherche&recherche=hemippus), the specimen that was captured in Syria and died in the Schönbrunn zoo, Vienna, in 1929 (measured by E.…

## Sheet: Table I
Measurements of the teeth of the hydruntines of Cheia
Cheia 3 and 4 are superior teeth and Cheia 5 is an inferior tooth.
Code	Cheia 3	Cheia 4	Cheia 5
Type teeth	M1/M2 left	M1/M2 right	P3/M2 left
Length (mm)	21.12	23.03	24.3
Breadth (mm)	20.11	19.95	13.6
Length at mid-crown (mm)	19.85	21.3
Breadth at mid-crown (mm)	20.23	21.01
Length of the protocone (mm)	6.65	6.81
Length of the double knot (mm)			13.07
Length of the postflexid (mm)			11.1
Protocone index	31.5	29.6
Height (mm)	58.4	59	68.7
Occlusal surface	20.61	21.49

[truncated: 3 more sheets: Table J, Table K, Table L]
